# Supplementary material for: FujiLAM for the diagnosis of childhood tuberculosis: a systematic review
Source: PubMed Central journal article supplement — BMJ Paediatr Open. 2022 Jul 13;6(1):e001447. doi: 10.1136/bmjpo-2022-001447 (PMC9280905; doi:10.1136/bmjpo-2022-001447), 2022-07-13
Supplement: bmjpo-2022-001447.draft_revisions.pdf [file bmjpo-2022-001447.draft_revisions.pdf]

# BMJ Paediatrics Open

BMJ Paediatrics Open is committed to open peer review. As part of this commitment we make the peer review history of every article we publish publicly available.

When an article is published we post the peer reviewers' comments and the authors' responses online. We also post the versions of the paper that were used during peer review. These are the versions that the peer review comments apply to.

The versions of the paper that follow are the versions that were submitted during the peer review process. They are not the versions of record or the final published versions. They should not be cited or distributed as the published version of this manuscript.

BMJ Paediatrics Open is an open access journal and the full, final, typeset and author-corrected version of record of the manuscript is available on our site with no access controls, subscription charges or pay-per-view fees (<http://bmjpaedsopen.bmj.com>).

If you have any questions on BMJ Paediatrics Open's open peer review process please email [info.bmjpo@bmj.com](mailto:info.bmjpo@bmj.com)

# BMJ Paediatrics Open

## FujiLAM for the diagnosis of childhood tuberculosis: A systematic review

|                               |                                                                                                                                                                                                                                                                                                                                                                                                                                                                                                                                                                                                                       |
|-------------------------------|-----------------------------------------------------------------------------------------------------------------------------------------------------------------------------------------------------------------------------------------------------------------------------------------------------------------------------------------------------------------------------------------------------------------------------------------------------------------------------------------------------------------------------------------------------------------------------------------------------------------------|
| Journal:                      | <i>BMJ Paediatrics Open</i>                                                                                                                                                                                                                                                                                                                                                                                                                                                                                                                                                                                           |
| Manuscript ID                 | bmjpo-2022-001447                                                                                                                                                                                                                                                                                                                                                                                                                                                                                                                                                                                                     |
| Article Type:                 | Original research                                                                                                                                                                                                                                                                                                                                                                                                                                                                                                                                                                                                     |
| Date Submitted by the Author: | 08-Feb-2022                                                                                                                                                                                                                                                                                                                                                                                                                                                                                                                                                                                                           |
| Complete List of Authors:     | Olbrich, Laura; Ludwig Maximilians University Munich, Division of Infectious Diseases and Tropical Medicine, University Hospital, LMU Munich; University of Oxford, Department of Paediatrics<br>Khambati, Nisreen; University of Oxford, Department of Paediatrics<br>Bijker, Else Margreet; University of Oxford, Department of Paediatrics<br>Ruhwald, Morten; FIND<br>Heinrich, Nobert; Ludwig-Maximilians-Universitat Munchen, Division of Infectious Diseases and Tropical Medicine, University Hospital, LMU Munich<br>Song, Rinn; University of Oxford, Department of Paediatrics; Boston Children's Hospital |
| Keywords:                     | Epidemiology, Statistics                                                                                                                                                                                                                                                                                                                                                                                                                                                                                                                                                                                              |
|                               |                                                                                                                                                                                                                                                                                                                                                                                                                                                                                                                                                                                                                       |

SCHOLARONE™  
Manuscripts

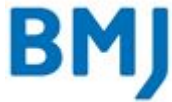

I, the Submitting Author has the right to grant and does grant on behalf of all authors of the Work (as defined in the below author licence), an exclusive licence and/or a non-exclusive licence for contributions from authors who are: i) UK Crown employees; ii) where BMJ has agreed a CC-BY licence shall apply, and/or iii) in accordance with the terms applicable for US Federal Government officers or employees acting as part of their official duties; on a worldwide, perpetual, irrevocable, royalty-free basis to BMJ Publishing Group Ltd ("BMJ") its licensees and where the relevant Journal is co-owned by BMJ to the co-owners of the Journal, to publish the Work in this journal and any other BMJ products and to exploit all rights, as set out in our [licence](#).

The Submitting Author accepts and understands that any supply made under these terms is made by BMJ to the Submitting Author unless you are acting as an employee on behalf of your employer or a postgraduate student of an affiliated institution which is paying any applicable article publishing charge ("APC") for Open Access articles. Where the Submitting Author wishes to make the Work available on an Open Access basis (and intends to pay the relevant APC), the terms of reuse of such Open Access shall be governed by a Creative Commons licence – details of these licences and which [Creative Commons](#) licence will apply to this Work are set out in our licence referred to above.

Other than as permitted in any relevant BMJ Author's Self Archiving Policies, I confirm this Work has not been accepted for publication elsewhere, is not being considered for publication elsewhere and does not duplicate material already published. I confirm all authors consent to publication of this Work and authorise the granting of this licence.

# FujiLAM for the diagnosis of childhood tuberculosis: A systematic review

## *Abbreviated & running title: FujiLAM for diagnosis of childhood TB*

### Authors and Affiliations

Laura Olbrich, MD \*<sup>1,2,3</sup>; Nisreen Khambati, MD \*<sup>3</sup>; Else Margreet Bijker, MD PhD<sup>3</sup>, Morten Ruhwald, MD PhD<sup>4</sup>, Norbert Heinrich, MD<sup>1,2</sup>, Rinn Song, MD<sup>3,5</sup>

\* Joint first author

1 Division of Infectious Diseases and Tropical Medicine, University Hospital, LMU Munich, Germany;

2 German Centre for Infection Research (DZIF), Partner Site Munich, Munich, Germany;

3 Oxford Vaccine Group, Department of Paediatrics, University of Oxford, Oxford, UK

4 FIND, the Global Alliance for Diagnostics. Chemin des Mines 9, 1201 Geneva, Switzerland

5 Division of Infectious Diseases, Boston Children's Hospital, Boston, Massachusetts, USA)

### Key words

Childhood TB, FujiLAM, lipoarabinomannan, diagnosis

### Corresponding Author

LMU Klinikum, Division of Infectious Diseases and Tropical Medicine

Leopoldstraße 5, 80802 Munich, Germany

Phone +49 89 4400-59803, Fax +49 89 336038

[olbrich@lrz.uni-muenchen.de](mailto:olbrich@lrz.uni-muenchen.de)

### Funding

FINDs work to support development and manufacturer independent evaluations in clinical trials of the FujiFilm SILVAMP TB test is made possible through a grant from the Global Health Innovative Technology (GHIT) Fund (Japan) (grant number G2015- 201).

### Conflicts

MR is employed by FIND, the Global Alliance for Diagnostics. FIND is a not-for-profit NGO that collaborates in partnerships to develop, evaluate and implement new diagnostics for LMIC. FIND has product evaluation agreements with FujiFilm and several other private sector companies that design diagnostics and related products for treatment of tuberculosis and other diseases. These agreements strictly define FIND's independence and neutrality vis-à-vis the companies whose products get evaluated and describe roles and responsibilities.

**“What is already known on this topic”**

- Despite recent advances, paediatric TB remains difficult to diagnose and accurate point-of-care tests that use easily obtainable non-sputum specimens are urgently needed.
- Lateral flow tests detecting urine lipoarabinomannan (LAM), including the original AlereLAM and the recently developed FujiLAM, could improve diagnosis in children in low-resource settings.
- FujiLAM’s analytic sensitivity for the diagnosis of pulmonary TB was found to be higher compared to AlereLAM in adults.

**“What this study adds”**

- Compared to AlereLAM, FujiLAM has a moderate but superior diagnostic sensitivity in diagnosing childhood TB whilst maintaining a high specificity.
- Gaps in studies and points to be addressed in forthcoming evaluations are emphasised, including subgroup analyses, prospective testing, and application of rigorous reference standards.

**“How this study might affect research, practice or policy”**

- Whilst more paediatric studies are needed, high specificity and use of an easy-to-obtain specimen indicates that FujiLAM could be a useful rule-in test for TB

## ABSTRACT

### Background

Childhood tuberculosis (TB) remains underdiagnosed. The novel lateral flow FujiLAM assay detects lipoarabinomannan (LAM) in urine, but data on performance in children remain limited.

### Methods

We conducted a systematic review assessing the diagnostic performance of FujiLAM for diagnosing paediatric TB, using AlereLAM as a comparator. The last search was conducted in November 2021.

### Results

We included three studies with data from 698 children for FujiLAM and 619 for AlereLAM. For FujiLAM, pooled sensitivity and specificity using a microbiological reference standard (MRS) were 51% (95%CI 43-59) and 87% (95%CI 84-90), respectively, and 27% (95%CI 23-32) and 87% (95%CI 82-90) using a composite reference standard (CRS). For AlereLAM, sensitivity and specificity were 41% (95%CI 33-50) and 83% (95%CI 79-86) for MRS, and 32% (95%CI 27-37) and 88% (95%CI 84-92) for CRS. Subgroup analyses for FujiLAM suggested an increased sensitivity in children living with HIV, especially when immunocompromised. Meta-analysis was not performed due to considerable study heterogeneity.

### Conclusion

This systematic review demonstrates that FujiLAM in children has a moderate but potentially superior sensitivity compared to AlereLAM, whilst still maintaining a high specificity. Although the small number of studies in children and overlapping confidence intervals between the two tests highlight that further data is needed, as an instrument-free point-of-care test that uses an easy-to-obtain specimen, FujiLAM has potential to improve TB diagnosis in children in low-resource settings. This review emphasises the points to be addressed in forthcoming paediatric evaluations, including the application of rigorous reference standards and specific subgroup analysis, to characterise its performance in different geographical locations and disease phenotypes.

## INTRODUCTION

Childhood tuberculosis (TB) is a major contributor to morbidity and mortality worldwide (1). The very young are disproportionately affected in case load and mortality, contributing to approximately 50% of all paediatric TB cases (2) and 80% of deaths (2, 3). The burden and mortality of paediatric TB are likely underestimated, as confirmation of disease remains challenging. There is an unmet need for accurate and easy-to-use diagnostic tests for children.

The World Health Organisation (WHO) has defined target product profiles (TPP) for new non-sputum-based point-of-care (POC) diagnostics for TB in children(4). Promising candidates include lateral flow assays detecting lipoarabinomannan (LAM), a glycolipid found in the mycobacterial cell-wall, secreted in urine. The first commercially available test was the Alere Determine TB LAM Ag (AlereLAM; Abbott, Palatine, IL, USA), which is the only instrument-free POC LAM test currently recommended by the WHO (5, 6). According to a systematic review in adults, pooled sensitivity of the AlereLAM is 42% (7) and increases to 54% in PLHIV with CD4  $\leq$ 100 cells/ $\mu$ L (7, 8). Recently, Fujifilm developed the Fujifilm SILVAMP TB LAM assay (FujiLAM; Fujifilm, Tokyo, Japan), a novel lateral flow test detecting LAM in urine (9, 10). Initial studies in hospitalised HIV-infected adults with TB showed a significantly higher sensitivity of 70% (9). A recent modelling study also suggested that conducting FujiLAM in adults presenting with TB symptoms averted 30% of TB deaths and 18% of incident cases (5, 11).

In contrast to the increasing number of publications in adults (5, 8, 12-15), few studies have explored the performance of FujiLAM in children and none have modelled its impact on clinical outcomes. In children, diagnostic yield, which represents both the diagnostic accuracy of a test and feasibility of obtaining a specimen (16), is improved by the availability of a specimen such as urine, compared to sputum. FujiLAM could therefore have a positive impact to reduce the burden of childhood TB. A systematic review on FujiLAM in children has not yet been performed. Here, we reviewed diagnostic test accuracy studies that assessed the sensitivity and specificity of FujiLAM to diagnose TB in children.

## METHODS

The protocol for this systematic review was registered at PROSPERO (CRD42021270761). Reporting was according to the Preferred Reporting Items for Systematic Reviews and Meta-Analyses (PRISMA) guidelines (17).

### Search strategy and study selection

We identified studies via PubMed and EMBASE and registration of past and ongoing studies (clinicaltrials.gov, WHO trial registry). Additionally, we consulted experts in TB diagnostics to identify relevant publications. There were no restrictions on language or time of publication. The full search strategy incorporated various terms (text words, keywords, and medical subject headings) related to lipoarabinomannan, tuberculosis, and children, and is presented in the Supplementary material. The last search was conducted on 10th November 2021.

Any original data study that reported diagnostic accuracy estimations on the performance of FujiLAM in children (defined as less than 18 years) for TB was included. The index test was FujiLAM, the comparator where available was AlereLAM. We excluded animal studies, conference proceedings, editorials and reviews. The eligibility assessment was performed by two investigators (LO, NK), who independently screened titles and abstracts followed by full text review. Any disagreement was resolved through discussion with a third reviewer.

### Risk of bias assessment

Two independent investigators (LO, NK) assessed the quality of included studies using the Quality Assessment of Diagnostic Accuracy Studies 2 (QUADAS-2) framework (18), all standard items were applied (19). Consensus was achieved through discussion and consultation with a third reviewer if necessary. RevMan (version 5, The Cochrane Collaboration, 2020) (20) was used for visualisation.

### Data collection

The following information was extracted from the original publications by LO and NK independently and exported (XML), with any discrepancies discussed with a third reviewer:

- i. Characteristics of cohort (including age, clinical presentation, country of origin, HIV-status)



- 133 ii. In- and exclusion criteria
- 134 iii. Reference standards
- 135 iv. Diagnostic accuracy measures

## 136 **Summary measures and data analysis**

137 The outcome measures were sensitivity and specificity of FujiLAM to diagnose active TB in children,  
138 using a microbiological reference standard (MRS; culture and/or WHO-endorsed nucleic acid  
139 amplification tests - NAAT) or a composite reference standard (CRS). Sensitivity was defined as  
140 probability of a positive test in diseased children, while specificity represented the probability of a  
141 negative test result when the disease was absent. Analyses were performed using RevMan (version  
142 5, The Cochrane Collaboration, 2020) (20).

## 143 **Patient and Public Involvement**

144 Being a systematic review, this research was done without patient or public involvement.

## 146 **RESULTS**

### 147 **Study results**

148 The search identified 149 unique records from which 24 full texts were reviewed for eligibility and 3  
149 studies met inclusion criteria (**Supplemental figure 1**). No further registered trials, or publications  
150 on preprint servers were identified. **Table 1** shows the characteristics of the studies. The clinical  
151 settings differed; two studies were conducted in sub-Saharan Africa and one in Haiti. Studies also  
152 varied in the healthcare level for recruitment and proportion of children with microbiologically  
153 confirmed TB. In all studies, enrolment was prospective, but the index test FujiLAM was evaluated  
154 on biobanked samples. Only the African studies assessed the performance of AlereLAM. Due to  
155 study heterogeneity, a meta-analysis was not done.

### 156 **Quality**

157 **Figure 1** summarises the risk of bias and applicability of included studies, there were no  
158 disagreements between reviewers. Two studies had some concerns regarding risk of bias relating

to patient selection. One study enriched their cohort by specifically including known microbiologically confirmed CLHIV (21). Another study recruited healthy controls, which tends to over-estimate diagnostic performance and did not explicitly state that samples were taken consecutively (22). The index test domain was generally at low risk of bias, with all studies reporting blinded interpretation by two readers. Due to the challenges in confirming TB disease in children, interpreting the true value of a novel test remains problematic, especially for those without microbiological confirmation (23-25). Accordingly, all studies explicitly described the reference standards and tested the index test against both an MRS and a CRS. One study, was deemed at high risk of bias as the MRS only included Xpert MTB/RIF and not culture (22). The risk of bias was low for all studies regarding patient flow and timing.

### Test accuracy

**Table 2** outlines the in- and exclusion criteria, microbiological investigations, reference standards, and case definitions of studies. All studies applied an MRS, being roughly equivalent to the National Institutes of Health (NIH) clinical case definition of “confirmed TB” (25), requiring microbiological confirmation of MTB, although underlying tests and testing algorithms varied between the studies. CRS were also used, with both microbiologically confirmed and clinically diagnosed TB defined as CRS positive, however, underlying clinical information varied between studies.

The total number of children included in this analysis was 698 for FujiLAM, with 152 (21%) confirmed by MRS and 396 (54%) by CRS. For AlereLAM, data from 619 children (89%) were available, with 147 (24%) confirmed by MRS and 341 (55%) by CRS. The sensitivity and specificity of index tests across the studies are shown in **Table 3** and **Figure 2**.

#### *Microbiological reference standard (MRS)*

When applying the MRS, sensitivity of FujiLAM was estimated at 60% (95%CI 15-95), 42% (95%CI 31-53), and 63% (95%CI 50-75) for the three studies respectively (pooled sensitivity 51% (95%CI 43-59)). For specificity, estimations were 93% (95%CI 85-98), 92% (95%CI 85-96), and 84% (95%CI 80-88; pooled specificity 87% (95%CI 84-90)) (**Figure 2**). For the comparator AlereLAM,

sensitivities were 50% (95%CI 39–61) and 30% (95%CI 19–43) for the individual studies (pooled sensitivity 41% (95%CI 33-50)). While FujiLAM sensitivity was significantly higher compared to AlereLAM in the study by Nkereuwem et al., this was neither the case for the study by Nicol et al., nor the pooled analysis. AlereLAM specificity estimates differed between the two African studies with 66% (95%CI 57–74) and 89% (95%CI 85–92; pooled specificity 83% (95%CI 79-86)), which was not significantly different from FujiLAM.

### *Composite reference standard (CRS)*

When applying the CRS, sensitivity of FujiLAM was 11% (95%CI 4-22), 27% (95%CI 20-34), and 33% (95%CI 26-40; pooled sensitivity 27% (95%CI 23-32)). Specificity estimates were 92% (95%CI 73-99), 97% (95%CI 87-100), and 85% (95%CI 79-89; pooled specificity 87% (95%CI 82-90)). For AlereLAM, sensitivity estimates differed considerably between studies with 44% (95%CI 37-52) and 20% (95%CI 15-27; pooled sensitivity 32% (95%CI 27-37)). AlereLAM specificity was 74% (95%CI 58-87) and 90% (95%CI 86-94; pooled specificity 88% (95%CI 84-92)).

### *Results stratified by HIV*

The Haitian study excluded CLHIV, therefore only the African studies assessed performance in this subgroup. Data only allowed for comparison to the MRS (**Figure 2**). For CLHIV, sensitivity of FujiLAM tended to be higher with 60% (95%CI 39-79) and 53% (95%CI 27-79; pooled sensitivity 57% (95%CI 41-73)) compared to AlereLAM with 36% (95%CI 18-57) and 33% (95%CI 12-62), although confidence intervals were wide and overlapped. Specificity of FujiLAM in CLHIV was 93% (95%CI 68-100) and 76% (95%CI 61-87; pooled specificity 80% (95%CI 68-89)). Neither sensitivity nor specificity showed a statistically significant difference between FujiLAM and AlereLAM in CLHIV, but the number of included children was too low to draw robust conclusions. Only one study demonstrated test performance stratified by CD4-count, suggesting a higher sensitivity of 80% (95%CI 38-96) in children with CD4-counts <200/uL, compared to 55% (95%CI 34-74) in children with CD4-counts >200/uL. In contrast, specificity was higher in children with CD4-counts >200/uL (100%, 95%CI 74-100; compared to 75%, 95%CI 30-95), but wide confidence intervals limit the interpretation of observed differences.

In HIV-negative children, estimates on FujiLAM performance differed considerably: while one study showed a lower sensitivity, 34% versus 60% in CLHIV, another stated a sensitivity of 67% (compared to 53% in CLHIV). Specificity estimates were less ambiguous with 93% (95%CI 85-98), 91% (95%CI 84-96), and 87% (95%CI 82-90), and overall comparable estimates in CLHIV. Performance estimates for AlereLAM in HIV-negative children were divergent: one group reported a sensitivity of 56% (compared to 36% in CLHIV), another a sensitivity of 30% (compared to 33% in CLHIV). Specificity estimates differed more markedly (69% (95%CI 59-77) and 90% (95%CI 86-93)).

## DISCUSSION

We examined the accuracy of the recently developed FujiLAM to diagnose paediatric TB across the available literature. While there are numerous studies evaluating FujiLAM for diagnosing TB in adults (5, 8, 12-15), there are only three paediatric publications (21, 22, 26), two of which used AlereLAM as a comparator (21, 26). We estimated a pooled sensitivity of 51% and specificity of 87% for FujiLAM, which was higher compared to 41% and 83% for the AlereLAM, when applying an MRS. Confidence intervals for the point estimates between the two types of lateral flow tests overlapped, therefore conclusions must be interpreted with caution, especially given the small number of paediatric studies. However, the higher specificity of FujiLAM is promising. Compared to sputum where collection is difficult, urine can mostly be obtained within the first 24h of admission and benefits for diagnostic yield and potentially clinical outcomes are likely (27, 28). FujiLAM could have particular utility when used in combination within a diagnostic algorithm to rule-in TB in children with a high pre-test probability, like CLHIV or malnourished children in high endemic settings (29).

The estimated sensitivity of FujiLAM here is comparable to results from a multicenter diagnostic accuracy study in HIV-negative adults (53%) (5). In this study, a strong association of sensitivity with bacterial load was observed, which likely impacts performance in children, as they generally have paucibacillary disease. Diagnostic evaluations for TB in children remain difficult, as available reference standards are imperfect. While the MRS might miss TB cases, a CRS potentially includes

children not ill with TB, both hampering the interpretability of sensitivity estimates. Using an MRS is likely to underestimate specificity because the number of children with TB and therefore the proportion of true negatives are underestimated. How studies define their reference standards may also contribute to heterogeneity in accuracy estimates. While all studies applied the NIH clinical case definitions for intrathoracic tuberculosis (25), underlying clinical and microbiological investigations varied. For example, one study did solely perform NAAT but not culture, and only in cases with positive smear microscopy or abnormal chest Xray, potentially misclassifying microbiologically confirmed cases and subsequently underestimating sensitivity (22). This heterogeneity of classifications outlines the necessity of applying standardised diagnostic classifications rigorously to enable cross-comparisons and meta-analyses (23-25).

Patient cohorts (and therefore pre-test probabilities) also differed considerably between studies. Participants were recruited from different levels of health care, reflecting real-life variation, which is favorable for the generalizability of results (30). However, all tests were performed on biobanked specimen in research laboratory settings. Broger and colleagues compared test read-outs of fresh vs. biobanked samples from adult patients, and while categorical agreement was high, a reduction of positive percentage agreement was observed (31). Studies using FujiLAM on fresh specimens, prospectively, and in real-life settings need to be conducted in children.

Subgroups of highest priority include CLHIV and the very young, who are at high risk of dying from TB (2). We found that FujiLAM's sensitivity was slightly higher in CLHIV, but reliable conclusions are difficult to draw due to small numbers. Analyses stratified by age were only performed in the African studies, but different age cut-offs were used (21, 26), and direct comparison was not possible. Estimates in the original publications suggest a similar sensitivity, but a pronounced decrease in specificity in younger children. An explanation could be contamination in nappy-wearing children, with specificity potentially compromised due to corynebacteria, dust, soil, and stool (29, 32, 33). Future studies should follow strict collection criteria to prevent contamination and describe them in detail. Finally, data on LAM-assays in extrapulmonary cases (EPTB) remain scarce and reported sensitivities of FujiLAM range from 47-94% in adults (34). Extrapulmonary manifestations are more

266 common in children, but only one study recruited those cases and did not show subgroup analysis  
1  
2  
3  
4  
5  
6  
7  
8  
9  
10  
11  
12  
13  
14  
15  
16  
17  
18  
19  
20  
21  
22  
23  
24  
25  
26  
27  
28  
29  
30  
31  
32  
33  
34  
35  
36  
37  
38  
39  
40  
41  
42  
43  
44  
45  
46  
47  
48  
49  
50  
51  
52  
53  
54  
55  
56  
57  
58  
59  
60

(22).

All included studies, and thus this review, have limitations and data gaps. In addition to those already discussed, the geographical distribution of cohorts was limited to sub-Saharan Africa and Haiti and results may not be generalisable to other regions. Lastly, important subgroup analyses could not be performed across cohorts due to unavailability of data and variable application of definitions, such as test performance in EPTB, CD4-count in CLHIV (except for one study), and specific age-groups.

This review summarises the current evidence of FujiLAM in comparison to the original AlereLAM assay, with the high specificity demonstrating its potential as a POC rule-in test for diagnosing paediatric TB. It reflects the current state of knowledge, highlighting that more data on FujiLAM in children are needed to more accurately understand the diagnostic value of this test at scale and suggests the points to be addressed in forthcoming evaluations. Late inclusion of children into evaluations of new technologies limits progress in childhood TB and this study stresses the demand for more prospective assessments in real-life settings from several geographical regions with different subgroups, including CLHIV and extrapulmonary disease.



## REFERENCES

1. Dodd PJ, Yuen CM, Sismanidis C, Seddon JA, Jenkins HE. The global burden of tuberculosis mortality in children: a mathematical modelling study. *The Lancet Global Health*. 2017;5(9):e898-e906. doi: 10.1016/S2214-109X(17)30289-9.
2. Organization WH. Roadmap towards ending TB in children and adolescents2018.
3. Frost WH. The age selection of mortality from tuberculosis in successive decades. *American Journal of Epidemiology*. 1939;30(3):91-6.
4. Organization WH. High-priority target product profiles for new tuberculosis diagnostics: report of a consensus meeting. Geneva, Switzerland; 2014. 2014.
5. Broger T, Nicol MP, Sigal GB, Gotuzzo E, Zimmer AJ, Surtie S, Caceres-Nakiche T, Mantsoki A, Reipold EI, Székely R, Tsionsky M, van Heerden J, Plisova T, Chikamatsu K, Lowary TL, Pinter A, Mitarai S, Moreau E, Schumacher SG, Denkinger CM. Diagnostic accuracy of 3 urine lipoarabinomannan tuberculosis assays in HIV-negative outpatients. *J Clin Invest*. 2020;130(11):5756-64. Epub 2020/07/22. doi: 10.1172/jci140461. PubMed PMID: 32692731; PMCID: PMC7598043.
6. Organization WH. WHO consolidated guidelines on tuberculosis: module 3: diagnosis—rapid diagnostics for tuberculosis detection: web annex 4: evidence synthesis and analysis2020.
7. Bjerrum S, Schiller I, Dendukuri N, Kohli M, Nathavitharana RR, Zwering AA, Denkinger CM, Steingart KR, Shah M. Lateral flow urine lipoarabinomannan assay for detecting active tuberculosis in people living with HIV. *Cochrane Database of Systematic Reviews*. 2019(10).
8. Bjerrum S, Broger T, Székely R, Mitarai S, Opintan JA, Kenu E, Lartey M, Addo KK, Chikamatsu K, Macé A, Schumacher SG, Moreau E, Shah M, Johansen IS, Denkinger CM. Diagnostic Accuracy of a Novel and Rapid Lipoarabinomannan Test for Diagnosing Tuberculosis Among People With Human Immunodeficiency Virus. *Open Forum Infect Dis*. 2020;7(1):ofz530. Epub 2020/01/25. doi: 10.1093/ofid/ofz530. PubMed PMID: 31976353; PMCID: PMC6966242.
9. Broger T, Sossen B, du Toit E, Kerkhoff AD, Schutz C, Reipold EI, Ward A, Barr DA, Macé A, Trollip A. Novel lipoarabinomannan point-of-care tuberculosis test for people with HIV: a diagnostic accuracy study. *The Lancet Infectious Diseases*. 2019;19(8):852-61.
10. Sigal GB, Pinter A, Lowary TL, Kawasaki M, Li A, Mathew A, Tsionsky M, Zheng RB, Plisova T, Shen K, Katsuragi K, Choudhary A, Honnen WJ, Nahid P, Denkinger CM, Broger T. A Novel Sensitive Immunoassay Targeting the 5-Methylthio-d-Xylofuranose-Lipoarabinomannan Epitope Meets the WHO's Performance Target for Tuberculosis Diagnosis. *J Clin Microbiol*. 2018;56(12). Epub 2018/09/28. doi: 10.1128/jcm.01338-18. PubMed PMID: 30257899; PMCID: PMC6258851.
11. Ricks S, Denkinger CM, Schumacher SG, Hallett TB, Arinaminpathy N. The potential impact of urine-LAM diagnostics on tuberculosis incidence and mortality: A modelling analysis. *PLoS medicine*. 2020;17(12):e1003466.
12. Kerkhoff AD, Sossen B, Schutz C, Reipold EI, Trollip A, Moreau E, Schumacher SG, Burton R, Ward A, Nicol MP. Diagnostic sensitivity of SILVAMP TB-LAM (FujiLAM) point-of-care urine assay for extra-pulmonary tuberculosis in people living with HIV. *European Respiratory Journal*. 2020;55(2).
13. Broger T, Nicol MP, Székely R, Bjerrum S, Sossen B, Schutz C, Opintan JA, Johansen IS, Mitarai S, Chikamatsu K, Kerkhoff AD, Macé A, Ongarello S, Meintjes G, Denkinger CM, Schumacher SG. Diagnostic accuracy of a novel tuberculosis point-of-care urine lipoarabinomannan assay for people living with HIV: A meta-analysis of individual in- and outpatient data. *PLoS Med*. 2020;17(5):e1003113. Epub 2020/05/02. doi: 10.1371/journal.pmed.1003113. PubMed PMID: 32357197; PMCID: PMC7194366 following competing interests: TB, SGS, AM, SO, RS and CMD were previously or are currently employed by FIND. TB reports a patent in the field of lipoarabinomannan detection. CMD is a member of PLOS Medicine's Editorial Board. The rest of the authors declare no competing interests associated with this manuscript. The corresponding author had full access to all the data in the study and had final responsibility for the decision to submit for publication.
14. Muyoyeta M, Kerkhoff AD, Chilukutu L, Moreau E, Schumacher SG, Ruhwald M. Diagnostic accuracy of a novel point-of-care urine lipoarabinomannan assay for the detection of tuberculosis among adult outpatients in Zambia: a prospective cross-sectional study. *European Respiratory Journal*. 2021.
15. Ignatius EH, Cohen KA, Bishai WR. Getting to the point in point-of-care diagnostics for tuberculosis. *The Journal of Clinical Investigation*. 2020;130(11).
16. Lawn SD, Kerkhoff AD, Burton R, Schutz C, Boulle A, Vogt M, Gupta-Wright A, Nicol MP, Meintjes G. Diagnostic accuracy, incremental yield and prognostic value of Determine TB-LAM for routine diagnostic

- 337 testing for tuberculosis in HIV-infected patients requiring acute hospital admission in South Africa: a  
338 prospective cohort. *BMC Medicine*. 2017;15(1):67. doi: 10.1186/s12916-017-0822-8.
- 339 17. Moher D, Altman DG, Liberati A, Tetzlaff J. PRISMA statement. *Epidemiology (Cambridge, Mass)*.  
340 2011;22(1):128.
- 341 18. Whiting PF, Rutjes AW, Westwood ME, Mallett S, Deeks JJ, Reitsma JB, Leeflang MM, Sterne JA,  
342 Bossuyt PM. QUADAS-2: a revised tool for the quality assessment of diagnostic accuracy studies. *Ann*  
343 *Intern Med*. 2011;155(8):529-36. Epub 2011/10/19. doi: 10.7326/0003-4819-155-8-201110180-00009.  
344 PubMed PMID: 22007046.
- 345 19. Whiting P, Rutjes AW, Reitsma JB, Bossuyt PM, Kleijnen J. The development of QUADAS: a tool for  
346 the quality assessment of studies of diagnostic accuracy included in systematic reviews. *BMC Med Res*  
347 *Methodol*. 2003;3:25. doi: 10.1186/1471-2288-3-25. PubMed PMID: 14606960; PMCID: 305345.
- 348 20. Collaboration TC. Review Manager (RevMan). Version 5.4.1 ed2020.
- 349 21. Nicol MP, Schumacher SG, Workman L, Broger T, Baard C, Prins M, Bateman L, du Toit E, van  
350 Heerden J, Szekely R, Zar HJ, Denkinger CM. Accuracy of a novel urine test, Fujifilm SILVAMP TB LAM,  
351 for the diagnosis of pulmonary tuberculosis in children. *Clin Infect Dis*. 2020. Epub 2020/08/08. doi:  
352 10.1093/cid/ciaa1052. PubMed PMID: 32761178.
- 353 22. Comella-del-Barrio P, Molina-Moya B, Gautier J, Villar-Hernández R, Doresca MJC, Sallés-Mingels  
354 B, Canales-Aliaga L, Narcisse M, Pérez-Porcuna TM, Creswell J. Diagnostic Performance of the Fujifilm  
355 SILVAMP TB-LAM in Children with Presumptive Tuberculosis. *Journal of Clinical Medicine*.  
356 2021;10(9):1914.
- 357 23. Cuevas LE, Browning R, Bossuyt P, Casenghi M, Cotton MF, Cruz AT, Dodd LE, Drobniewski F,  
358 Gale M, Graham SM, Grzemska M, Heinrich N, Hesselning AC, Huebner R, Jean-Philippe P, Kabra SK,  
359 Kampmann B, Lewinsohn D, Li M, Lienhardt C, Mandalakas AM, Marais BJ, Menzies HJ, Montepiedra G,  
360 Mwansambo C, Oberhelman R, Palumbo P, Russek-Cohen E, Shapiro DE, Smith B, Soto-Castellares G,  
361 Starke JR, Swaminathan S, Wingfield C, Worrell C. Evaluation of Tuberculosis Diagnostics in Children: 2.  
362 Methodological Issues for Conducting and Reporting Research Evaluations of Tuberculosis Diagnostics for  
363 Intrathoracic Tuberculosis in Children. Consensus From an Expert Panel. *The Journal of infectious*  
364 *diseases*. 2012;205 Suppl 2:S209-15  
365 Epub 2012/04/06. doi: jir879 [pii]  
366 10.1093/infdis/jir879. PubMed PMID: 22476719.
- 367 24. Graham SM, Ahmed T, Amanullah F, Browning R, Cardenas V, Casenghi M, Cuevas LE, Gale M,  
368 Gie RP, Grzemska M, Handelsman E, Hatherill M, Hesselning AC, Jean-Philippe P, Kampmann B, Kabra  
369 SK, Lienhardt C, Lighter-Fisher J, Madhi S, Makhene M, Marais BJ, McNeeley DF, Menzies H, Mitchell C,  
370 Modi S, Mofenson L, Musoke P, Nachman S, Powell C, Rigaud M, Rouzier V, Starke JR, Swaminathan S,  
371 Wingfield C. Evaluation of tuberculosis diagnostics in children: 1. Proposed clinical case definitions for  
372 classification of intrathoracic tuberculosis disease. Consensus from an expert panel. *The Journal of*  
373 *infectious diseases*. 2012;205 Suppl 2:S199-208. doi: 10.1093/infdis/jis008. PubMed PMID: 22448023;  
374 PMCID: 3334506.
- 375 25. Graham SM, Cuevas LE, Jean-Philippe P, Browning R, Casenghi M, Detjen AK, Gnanashanmugam  
376 D, Hesselning AC, Kampmann B, Mandalakas A, Marais BJ, Schito M, Spiegel HM, Starke JR, Worrell C,  
377 Zar HJ. Clinical Case Definitions for Classification of Intrathoracic Tuberculosis in Children: An Update. *Clin*  
378 *Infect Dis*. 2015;61Suppl 3:S179-87. doi: 10.1093/cid/civ581. PubMed PMID: 26409281; PMCID: 4583568.
- 379 26. Nkereuwem E, Togun T, Gomez MP, Székely R, Macé A, Jobe D, Schumacher SG, Kampmann B,  
380 Denkinger CM. Comparing accuracy of lipoarabinomannan urine tests for diagnosis of pulmonary  
381 tuberculosis in children from four African countries: a cross-sectional study. *Lancet Infect Dis*. 2020. Epub  
382 2020/12/15. doi: 10.1016/s1473-3099(20)30598-3. PubMed PMID: 33316214.
- 383 27. Gupta-Wright A, Corbett EL, van Oosterhout JJ, Wilson D, Grint D, Alufandika-Moyo M, Peters JA,  
384 Chiume L, Flach C, Lawn SD, Fielding K. Rapid urine-based screening for tuberculosis in HIV-positive  
385 patients admitted to hospital in Africa (STAMP): a pragmatic, multicentre, parallel-group, double-blind,  
386 randomised controlled trial. *The Lancet*. 2018;392(10144):292-301. doi: [https://doi.org/10.1016/S0140-6736\(18\)31267-4](https://doi.org/10.1016/S0140-6736(18)31267-4).
- 387 28. Nicol MP, Zar HJ. New specimens and laboratory diagnostics for childhood pulmonary TB: progress  
388 and prospects. *Paediatric respiratory reviews*. 2011;12(1):16-21.
- 389 29. Marais BJ. Improved Urine Lipoarabinomannan (LAM) Tests: The Answer for Child Tuberculosis  
390 Diagnosis? *Clinical Infectious Diseases*. 2020;72(9):e289-e90. doi: 10.1093/cid/ciaa1058.
- 391 30. Irwig L, Bossuyt P, Glasziou P, Gatsonis C, Lijmer J. Designing studies to ensure that estimates of  
392 test accuracy are transferable. *Bmj*. 2002;324(7338):669-71. Epub 2002/03/16. doi:  
393 10.1136/bmj.324.7338.669. PubMed PMID: 11895830; PMCID: PMC1122584.



- 395 31. Broger T, Muyoyeta M, Kerkhoff AD, Denkinge CM, Moreau E. Tuberculosis test results using fresh  
396 versus biobanked urine samples with FujiLAM. *The Lancet Infectious Diseases*. 2020;20(1):22-3.
- 397 32. Nicol MP, Allen V, Workman L, Isaacs W, Munro J, Pienaar S, Black F, Adonis L, Zemanay W,  
398 Ghebrekristos Y. Urine lipoarabinomannan testing for diagnosis of pulmonary tuberculosis in children: a  
399 prospective study. *The lancet global health*. 2014;2(5):e278-e84.
- 400 33. Kroidl I, Clowes P, Mwakyelu J, Maboko L, Kiangi A, Rachow A, Reither K, Jung J, Nsojo A,  
401 Saathoff E, Hoelscher M. Reasons for false-positive lipoarabinomannan ELISA results in a Tanzanian  
402 population. *Scand J Infect Dis*. 2013. doi: 10.3109/00365548.2013.853133. PubMed PMID: 24274710.
- 403 34. Kerkhoff AD, Sossen B, Schutz C, Reipold EI, Trollip A, Moreau E, Schumacher SG, Burton R,  
404 Ward A, Nicol MP, Meintjes G, Denkinge CM, Broger T. Diagnostic sensitivity of SILVAMP TB-LAM  
405 (FujiLAM) point-of-care urine assay for extra-pulmonary tuberculosis in people living with HIV. *European  
406 Respiratory Journal*. 2020;55(2):1901259. doi: 10.1183/13993003.01259-2019.

407  
14  
15  
16  
17  
18  
19  
20  
21  
22  
23  
24  
25  
26  
27  
28  
29  
30  
31  
32  
33  
34  
35  
36  
37  
38  
39  
40  
41  
42  
43  
44  
45  
46  
47  
48  
49  
50  
51  
52  
53  
54  
55  
56  
57  
58  
59  
60

## TABLE AND FIGURES

Table 1: Cohort characteristics

|                                                               |                                  | Nicol et al                                       | Nkereuwem et al.                                                               | Barrio et al.                                |
|---------------------------------------------------------------|----------------------------------|---------------------------------------------------|--------------------------------------------------------------------------------|----------------------------------------------|
| <b>Cohort size</b>                                            |                                  | 241                                               | 415                                                                            | 79                                           |
| <b>Study design</b>                                           |                                  | Prospective enrolment<br>Plus enrichment of CLHIV | Prospective enrolment                                                          | Prospective enrolment<br>Plus control cohort |
| <b>Index test</b>                                             | <b>Comparator</b>                | AlereLAM                                          | AlereLAM                                                                       | none                                         |
|                                                               | <b>Sample storage</b>            | Yes, -80°C                                        | Yes, -80°C                                                                     | Yes, -20°C                                   |
| <b>Country</b>                                                |                                  | South Africa                                      | Gambia, Mali, Nigeria,<br>Tanzania                                             | Haiti                                        |
| <b>Health care level of recruitment of study participants</b> |                                  | Tertiary hospital                                 | Mixed (community,<br>Tertiary hospital, urban<br>comprehensive health<br>care) | Reference hospital                           |
| <b>Age in months (median)<br/>Median (IQR)</b>                |                                  | 45.2<br>(21.2 – 88.8)                             | 67.2<br>(27.6-111.6)                                                           | 76<br>(58–121)                               |
| <b>Age categories</b>                                         | <b>&lt; 5 yrs.</b>               | 118 (58%)                                         | 194 (47%)                                                                      | 24 (30%)                                     |
|                                                               | <b>≥ 5 yrs.</b>                  | 86 (42%)                                          | 221 (53%)                                                                      | 55 (70%)                                     |
| <b>Male sex</b>                                               |                                  | 111 (54%)                                         | 225 (54%)                                                                      | 51 (65%)                                     |
| <b>TB status</b>                                              | <b>Confirmed TB</b>              | 84 (41%)                                          | 63 (15%)                                                                       | 5                                            |
|                                                               | <b>Unconfirmed TB</b>            | 81 (40%)                                          | 113 (27%)                                                                      | 50                                           |
|                                                               | <b>Unlikely TB</b>               | 39 (19%)                                          | 239 (58%)                                                                      | 24                                           |
| <b>HIV status</b>                                             | <b>HIV infected</b>              | 40 (20%)                                          | 61 (15%)                                                                       | excluded                                     |
|                                                               | <b>CD4 cells/uL median (IQR)</b> | 552 (206–849)                                     | -                                                                              | -                                            |
| <b>Malnutrition</b>                                           | <b>Stunted</b>                   | 73 (40%)                                          | 134 (32%)                                                                      | 12 (21%)                                     |

**Table 2:** Definitions of reference standards and diagnostic classifications

|                                                         |                                                 | <b>Nicol et al</b>                                                                                                                                                                                                                                                                               | <b>Nkereuwem et al.</b>                                                                                                                                                                                                                                                                                                               | <b>Barrio et al.</b>                                                                                                                                                                                                                                                                                                                                                                                                                      |
|---------------------------------------------------------|-------------------------------------------------|--------------------------------------------------------------------------------------------------------------------------------------------------------------------------------------------------------------------------------------------------------------------------------------------------|---------------------------------------------------------------------------------------------------------------------------------------------------------------------------------------------------------------------------------------------------------------------------------------------------------------------------------------|-------------------------------------------------------------------------------------------------------------------------------------------------------------------------------------------------------------------------------------------------------------------------------------------------------------------------------------------------------------------------------------------------------------------------------------------|
| <b>Enrolment criteria</b>                               | <b>Inclusion criteria</b>                       | - Symptoms suggestive of TB (pulmonary)                                                                                                                                                                                                                                                          | - Symptoms suggestive of TB (pulmonary)                                                                                                                                                                                                                                                                                               | - Symptoms suggestive of TB (pulmonary and extrapulmonary)<br>- Controls: negative TST and QFT-GIT, and no signs or symptoms of TB                                                                                                                                                                                                                                                                                                        |
|                                                         | <b>Exclusion criteria</b>                       | - More than 72 hours of TB treatment or prophylaxis<br>- Not a resident in Cape Town                                                                                                                                                                                                             | - Not specified<br>- Presence of mediastinal lymphadenopathy alone                                                                                                                                                                                                                                                                    | - Anti-TB treatment for two or more weeks before enrolment<br>- HIV positivity or other known immunodeficiencies or immunosuppressive treatment                                                                                                                                                                                                                                                                                           |
| <b>Symptoms of TB</b>                                   |                                                 | - Cough of any duration and at least one of the following:<br>- Household contact with an infectious tuberculosis source case within the preceding 3 months<br>- Loss of weight or failure to gain weight in the preceding 3 months<br>- Positive tuberculin skin test (TST)<br>- Suggestive CXR | Symptoms suggestive of pulmonary tuberculosis:<br>- Persistent or unremitting cough for more than 2 weeks<br>- and either weight loss, failure to thrive, or persistent unexplained fever                                                                                                                                             | Not specified                                                                                                                                                                                                                                                                                                                                                                                                                             |
| <b>TB sampling &amp; microbiological investigations</b> |                                                 | At least one induced sputum Xpert MTB/RIF or Xpert MTB/RIF Ultra® & MGIT                                                                                                                                                                                                                         | At least one induced sputum Xpert MTB/Rif Ultra® (all sites) & MGIT/LJ (not Nigerian site)                                                                                                                                                                                                                                            | Three consecutive sputum samples (induced or nasopharyngeal/nasogastric aspiration)<br>Smear microscopy, Xpert MTB/RIF if positive smear microscopy OR abnormal Xray                                                                                                                                                                                                                                                                      |
| <b>TB case classification</b>                           | <b>Confirmed TB</b>                             | Any induced sputum culture or Xpert MTB/RIF positive for M. tuberculosis                                                                                                                                                                                                                         | Bacteriological confirmation of Mycobacterium tuberculosis (culture, Xpert MTB/RIF assay, or both) from at least one respiratory specimen                                                                                                                                                                                             | Any sputum Xpert MTB/RIF positive for M. tuberculosis                                                                                                                                                                                                                                                                                                                                                                                     |
|                                                         | <b>Unconfirmed TB</b>                           | All children not defined as confirmed or unlikely TB                                                                                                                                                                                                                                             | Bacteriological confirmation not obtained, and at least two of the following:<br>- Symptoms or signs suggestive of tuberculosis<br>- Chest radiograph consistent with tuberculosis<br>- Close tuberculosis exposure<br>- Positive response to tuberculosis treatment (requires documented positive clinical response to tuberculosis) | Bacteriological confirmation not obtained<br>And positive TST/QFT-GIT and at least one of the following<br>- X-rays consistent with TB<br>- signs and symptoms of TB<br>- close TB exposure, or<br>- positive response to TB treatment<br>- OR if TST/QFT-GIT negative at least<br>- two clinical criteria<br>- X-rays consistent with TB<br>- signs and symptoms of TB<br>- close TB exposure, or<br>- positive response to TB treatment |
|                                                         | <b>Unlikely TB</b>                              | All of the following:<br>- TB culture negative<br>- No tuberculosis treatment given<br>- Documented improvement of symptoms and signs at follow up visit                                                                                                                                         | Bacteriological confirmation not obtained and criteria for unconfirmed tuberculosis not met                                                                                                                                                                                                                                           | Only evidence of M. tuberculosis infection<br>OR presented only one clinical criterion compatible with TB<br>Controls: negative TST and QFT-GIT, and no signs or symptoms of TB                                                                                                                                                                                                                                                           |
| <b>Definition of reference standards</b>                | <b>Microbiological reference standard (MRS)</b> | Positive = confirmed TB<br>Negative = unconfirmed & unlikely TB                                                                                                                                                                                                                                  | Positive = confirmed TB<br>Negative = unconfirmed & unlikely TB                                                                                                                                                                                                                                                                       | Positive = confirmed TB<br>Negative = unconfirmed & unlikely TB + controls                                                                                                                                                                                                                                                                                                                                                                |
|                                                         | <b>Composite reference standard (CRS)</b>       | Positive = confirmed & unconfirmed TB<br>Negative = unlikely TB                                                                                                                                                                                                                                  | Positive = confirmed & unconfirmed TB<br>Negative = unlikely TB                                                                                                                                                                                                                                                                       | Positive = confirmed & unconfirmed TB<br>Negative = unlikely TB + controls                                                                                                                                                                                                                                                                                                                                                                |

**Table 3: Diagnostic accuracy estimates as reported**

|                    | Nicol et al |        |        |        |        |        |           |        | Nkereuwem et al. |           |        |        |        |                 |        |           | Barrio et al. |           |           |        |        |        |        |        |       |        |        |
|--------------------|-------------|--------|--------|--------|--------|--------|-----------|--------|------------------|-----------|--------|--------|--------|-----------------|--------|-----------|---------------|-----------|-----------|--------|--------|--------|--------|--------|-------|--------|--------|
|                    | Total (n)   | TP (n) | FP (n) | FN (n) | TN (n) | Sens % | 95%CI     | Spec % | 95%CI            | Total (n) | TP (n) | FP (n) | FN (n) | TN (n)          | Sens % | 95%CI     | Spec %        | 95%CI     | Total (n) | TP (n) | FP (n) | FN (n) | TN (n) | Sens % | 95%CI | Spec % | 95%CI  |
| <b>Overall</b>     |             |        |        |        |        |        |           |        |                  |           |        |        |        |                 |        |           |               |           |           |        |        |        |        |        |       |        |        |
| <b>MRS</b>         |             |        |        |        |        |        |           |        |                  |           |        |        |        |                 |        |           |               |           |           |        |        |        |        |        |       |        |        |
| FujiLAM            | 204         | 35     | 10     | 49     | 110    | 41.7   | 31.7–52.3 | 91.7   | 85.3–95.4        | 415       | 40     | 55     | 23     | 297             | 64.9   | 43.7–85.2 | 83.8          | 76.5–89.4 | 79        | 3      | 5      | 2      | 69     | 60     | 17–93 | 95     | 73-100 |
| AlereLAM           | 204         | 42     | 41     | 42     | 79     | 50.0   | 39.5–60.5 | 65.8   | 57.0–73.7        | 415       | 19     | 40     | 44     | 312             | 30.7   | 8.6–61.6  | 87.8          | 79.0–93.7 | -         | -      | -      | -      | -      | -      | -     | -      | -      |
| <b>CRS</b>         |             |        |        |        |        |        |           |        |                  |           |        |        |        |                 |        |           |               |           |           |        |        |        |        |        |       |        |        |
| FujiLAM            | 204         | 44     | 1      | 121    | 38     | 26.7   | 20.5–33.9 | 97.4   | 86.8–99.5        | 415       | 58     | 37     | 118    | 202             | 32.9   | 24.6–41.9 | 83.3          | 71.8–91.7 | 73        | 6      | 2      | 49     | 22     | 11     | 523   | 92     | 72-99  |
| AlereLAM           | 204         | 73     | 10     | 92     | 29     | 44.2   | 36.9–51.9 | 74.4   | 58.9–85.4        | 415       | 36     | 23     | 140    | 216             | 20.2   | 12.3–29.4 | 90.0          | 81.6–95.6 | -         | -      | -      | -      | -      | -      | -     | -      | -      |
| <b>HIVpositive</b> |             |        |        |        |        |        |           |        |                  |           |        |        |        |                 |        |           |               |           |           |        |        |        |        |        |       |        |        |
| <b>MRS</b>         |             |        |        |        |        |        |           |        |                  |           |        |        |        |                 |        |           |               |           |           |        |        |        |        |        |       |        |        |
| FujiLAM            | 40          | 15     | 1      | 10     | 14     | 60.0   | 40.7–76.6 | 93.3   | 70.2–98.8        | 61        | 8      | 11     | 7      | 35              | 54.8   | 28.7–81.5 | 75.9          | 61.8–86.9 | -         | -      | -      | -      | -      | -      | -     | -      | -      |
| AlereLAM           | 40          | 9      | 8      | 16     | 7      | 36.0   | 20.2–55.5 | 46.7   | 24.8–69.9        | 61        | 5      | 9      | 10     | 37              | 36.6   | 13.8–70.4 | 80.4          | 66.3–91.0 | -         | -      | -      | -      | -      | -      | -     | -      | -      |
| <b>CRS</b>         |             |        |        |        |        |        |           |        |                  |           |        |        |        |                 |        |           |               |           |           |        |        |        |        |        |       |        |        |
| FujiLAM            | -           | -      | -      | -      | -      | -      | -         | -      | -                | 61        | 14     | 5      | 30     | 12              | 31.9   | 18.9–47.0 | 71.4          | 46.8–91.5 | -         | -      | -      | -      | -      | -      | -     | -      | -      |
| AlereLAM           | -           | -      | -      | -      | -      | -      | -         | -      | -                | 61        | 13     | 1      | 31     | 16              | 29.3   | 16.3–44.6 | 92.8          | 72.6–99.8 | -         | -      | -      | -      | -      | -      | -     | -      | -      |
| <b>HIVnegative</b> |             |        |        |        |        |        |           |        |                  |           |        |        |        |                 |        |           |               |           |           |        |        |        |        |        |       |        |        |
| <b>MRS</b>         |             |        |        |        |        |        |           |        |                  |           |        |        |        |                 |        |           |               |           |           |        |        |        |        |        |       |        |        |
| FujiLAM            | 164         | 20     | 9      | 39     | 96     | 33.9   | 23.1–46.6 | 91.4   | 84.5–95.4        | 344       | 31     | 40     | 15     | 258             | 67.5   | 41.8–88.0 | 85.9          | 79.2–91.0 | -         | -      | -      | -      | -      | -      | -     | -      | -      |
| AlereLAM           | 164         | 33     | 33     | 26     | 72     | 55.9   | 43.3–67.8 | 68.6   | 59.2–76.7        | 344       | 14     | 30     | 32     | 268             | 26.6   | 1.2–66.4  | 89.1          | 80.7–94.7 | -         | -      | -      | -      | -      | -      | -     | -      | -      |
| <b>CRS</b>         |             |        |        |        |        |        |           |        |                  |           |        |        |        |                 |        |           |               |           |           |        |        |        |        |        |       |        |        |
| FujiLAM            | -           | -      | -      | -      | -      | -      | -         | -      | -                | 344       | 43     | 28     | 86     | 187             | 33.2   | 23.7–43.5 | 85.7          | 76.2–92.2 | -         | -      | -      | -      | -      | -      | -     | -      | -      |
| AlereLAM           | -           | -      | -      | -      | -      | -      | -         | -      | -                | 344       | 23     | 21     | 106    | 194             | 15.3   | 1.7–37.5  | 89.3          | 81.0–94.7 | -         | -      | -      | -      | -      | -      | -     | -      | -      |
| <b>Age</b>         |             |        |        |        |        |        |           |        |                  |           |        |        |        |                 |        |           |               |           |           |        |        |        |        |        |       |        |        |
| <b>&lt;2yrs</b>    |             |        |        |        |        |        |           |        |                  |           |        |        |        | <b>&lt;5yrs</b> |        |           |               |           |           |        |        |        |        |        |       |        |        |
| <b>MRS</b>         |             |        |        |        |        |        |           |        |                  |           |        |        |        |                 |        |           |               |           |           |        |        |        |        |        |       |        |        |
| FujiLAM            | 59          | 9      | 7      | 13     | 30     | 40.9   | 23.3–61.3 | 81.1   | 65.8–90.5        | 194       | 16     | 35     | 10     | 133             | 61.8   | 36.6–85.5 | 78.5          | 69.1–86.0 | -         | -      | -      | -      | -      | -      | -     | -      | -      |
| AlereLAM           | 59          | 16     | 18     | 6      | 19     | 72.7   | 51.8–86.8 | 51.4   | 35.9–66.6        | 194       | 9      | 32     | 17     | 136             | 38.8   | 0.4–98.9  | 80.5          | 68.3–89.4 | -         | -      | -      | -      | -      | -      | -     | -      | -      |
| <b>CRS</b>         |             |        |        |        |        |        |           |        |                  |           |        |        |        |                 |        |           |               |           |           |        |        |        |        |        |       |        |        |
| FujiLAM            | -           | -      | -      | -      | -      | -      | -         | -      | -                | 194       | 28     | 23     | 55     | 88              | 33.3   | 19.8–48.3 | 78.4          | 66.5–87.2 | -         | -      | -      | -      | -      | -      | -     | -      | -      |
| AlereLAM           | -           | -      | -      | -      | -      | -      | -         | -      | -                | 194       | 20     | 21     | 63     | 90              | 23.3   | 10.0–39.9 | 81.4          | 70.4–90.4 | -         | -      | -      | -      | -      | -      | -     | -      | -      |
| <b>Age</b>         |             |        |        |        |        |        |           |        |                  |           |        |        |        |                 |        |           |               |           |           |        |        |        |        |        |       |        |        |
| <b>&gt;2yrs</b>    |             |        |        |        |        |        |           |        |                  |           |        |        |        | <b>&lt;5yrs</b> |        |           |               |           |           |        |        |        |        |        |       |        |        |
| <b>MRS</b>         |             |        |        |        |        |        |           |        |                  |           |        |        |        |                 |        |           |               |           |           |        |        |        |        |        |       |        |        |
| FujiLAM            | 145         | 26     | 3      | 36     | 80     | 41.9   | 30.5–54.3 | 96.4   | 90.0–98.8        | 221       | 24     | 20     | 13     | 164             | 67.1   | 40.1–90.2 | 88.8          | 82.1–93.6 | -         | -      | -      | -      | -      | -      | -     | -      | -      |
| AlereLAM           | 145         | 26     | 23     | 36     | 60     | 41.9   | 30.5–54.3 | 72.3   | 61.8–80.8        | 221       | 10     | 8      | 27     | 176             | 26.9   | 7.2–54.8  | 95.2          | 89.7–98.3 | -         | -      | -      | -      | -      | -      | -     | -      | -      |
| <b>CRS</b>         |             |        |        |        |        |        |           |        |                  |           |        |        |        |                 |        |           |               |           |           |        |        |        |        |        |       |        |        |
| FujiLAM            | -           | -      | -      | -      | -      | -      | -         | -      | -                | 221       | 30     | 14     | 63     | 114             | 32.7   | 22.4–44.4 | 88.2          | 76.0–96.4 | -         | -      | -      | -      | -      | -      | -     | -      | -      |
| AlereLAM           | -           | -      | -      | -      | -      | -      | -         | -      | -                | 221       | 16     | 2      | 77     | 126             | 17.3   | 9.6–27.4  | 98.1          | 93.7–99.9 | -         | -      | -      | -      | -      | -      | -     | -      | -      |

**Figure 1:** Assessment of study quality of FujiLAM paediatric studies using the QUADAS-2 framework. Risk of bias and applicability concerns graph (A) and summary (B): review authors' judgements about each domain presented as percentages across included studies

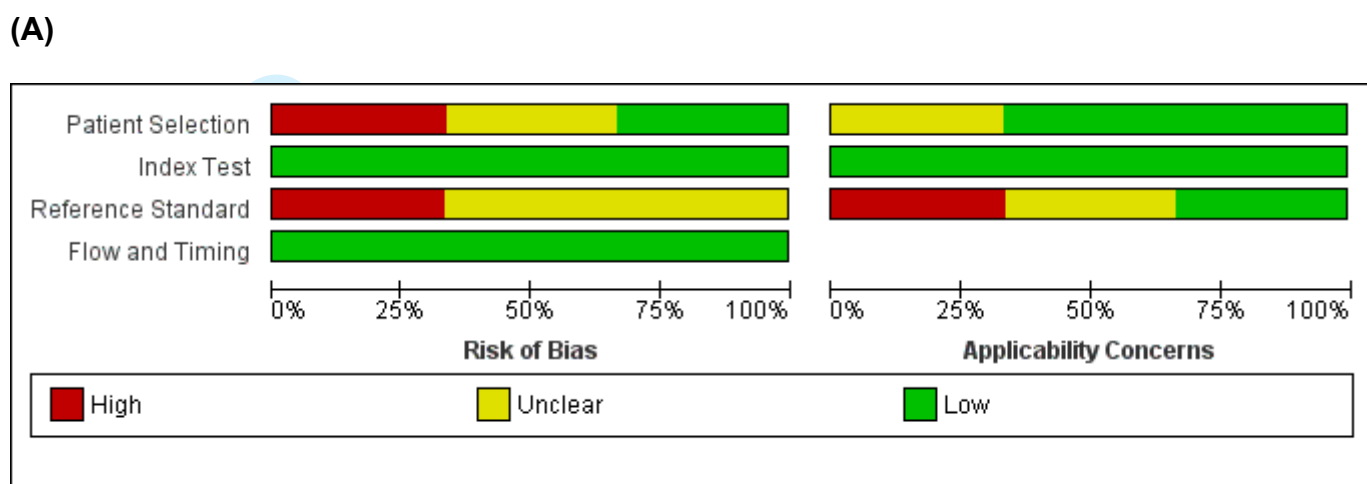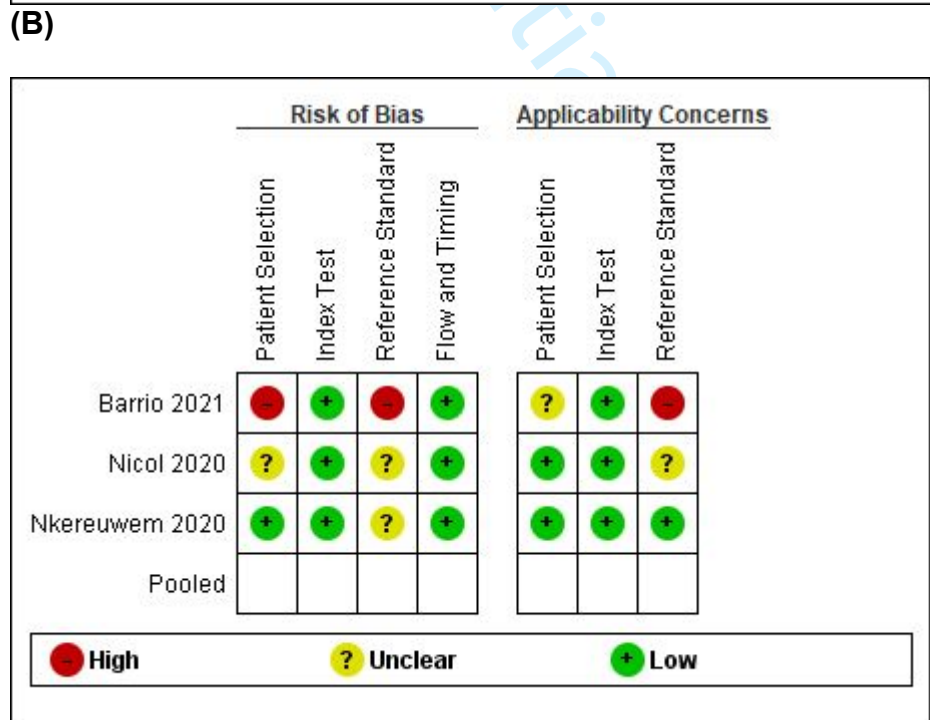

**Figure 2:** Forest Plots of performance of lateral flow LAM assays against MRS and CRS.

**FujiLAM vs MRS**

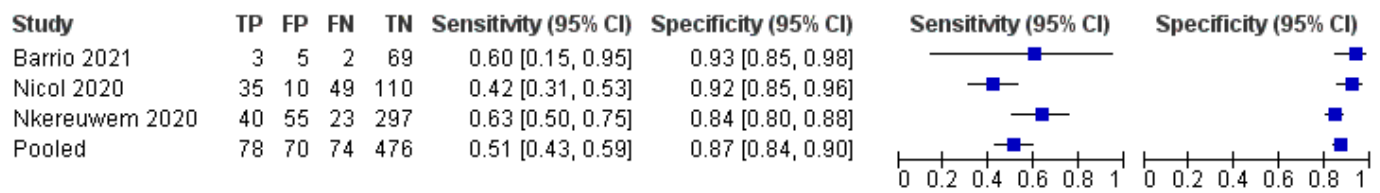

**FujiLAM vs CRS**

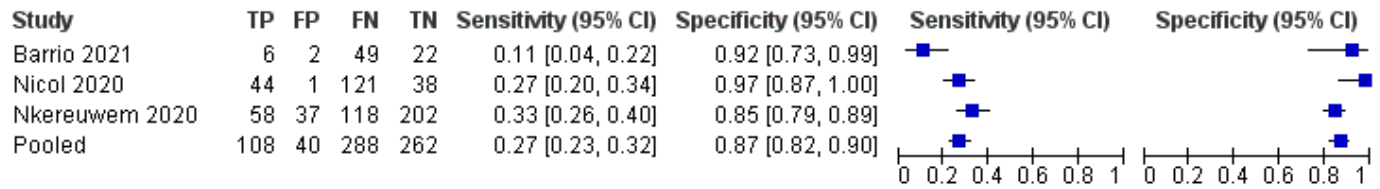

**AlerelAM vs MRS**

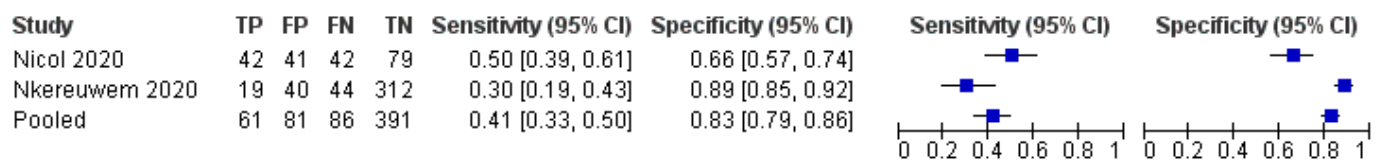

**AlerelAM vs CRS**

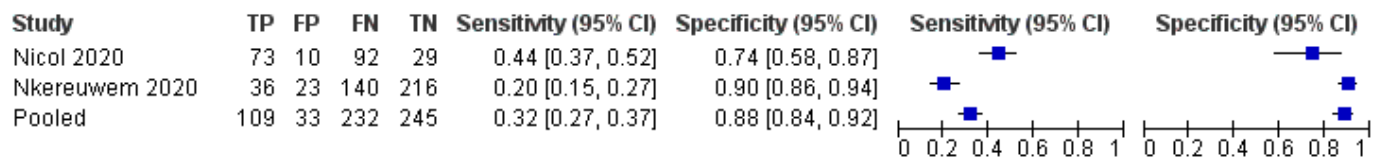

**FujiLAM vs MRS in HIV +**

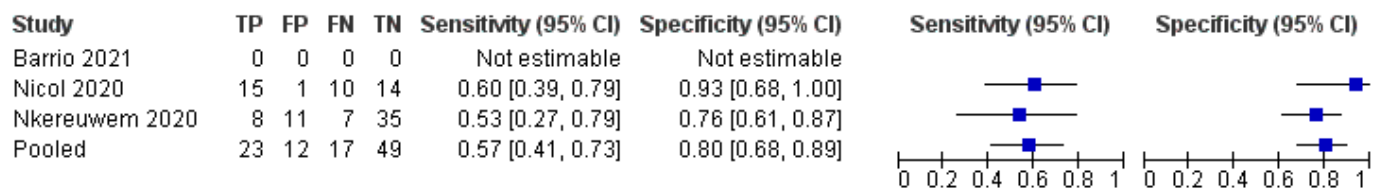

**AlerelAM vs MRS in HIV+**

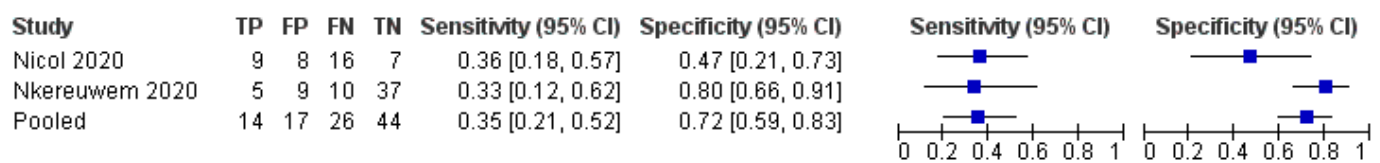

**FujiLAM vs MRS in HIV-**

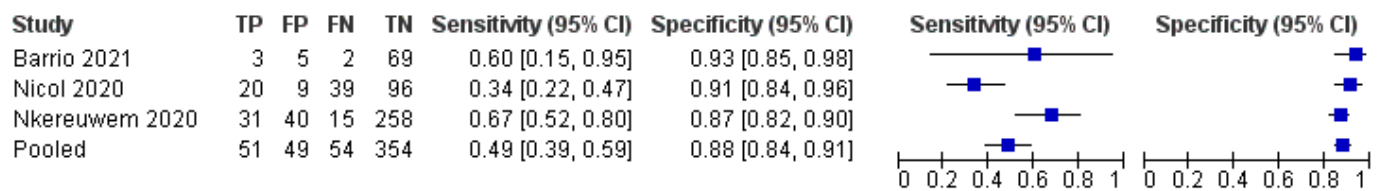

**AlerelAM vs MRS in HIV-**

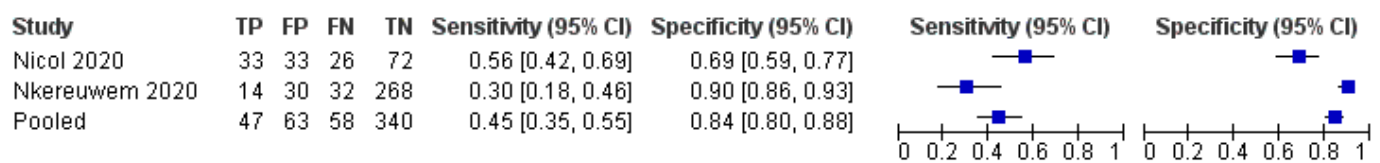

428 **Author's contribution:**  
1

2  
3 LO and NK conducted the literature search, screening of abstracts, data extraction, and analyses,  
4  
5 supported by EMB and RS. The manuscript was written mainly by LO and NK, and reviewed and  
6  
7 edited by EMB, MR, NH, and RS.  
8  
9  
10  
11  
12  
13  
14  
15  
16  
17  
18  
19  
20  
21  
22  
23  
24  
25  
26  
27  
28  
29  
30  
31  
32  
33  
34  
35  
36  
37  
38  
39  
40  
41  
42  
43  
44  
45  
46  
47  
48  
49  
50  
51  
52  
53  
54  
55  
56  
57  
58  
59  
60

Confidential: For Review Only

(A)

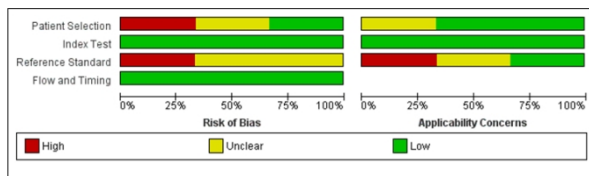

(B)

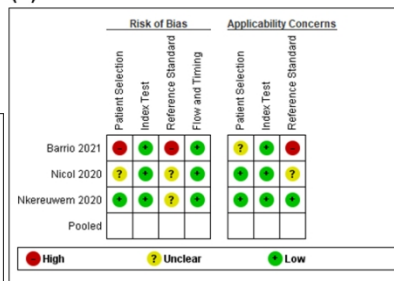

855x481mm (38 x 38 DPI)



## FujiLAM vs MRS

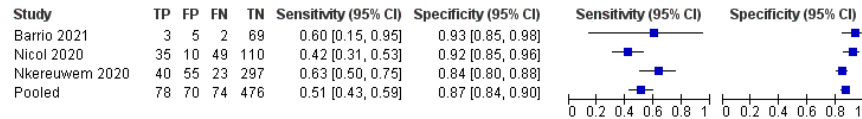

## FujiLAM vs CRS

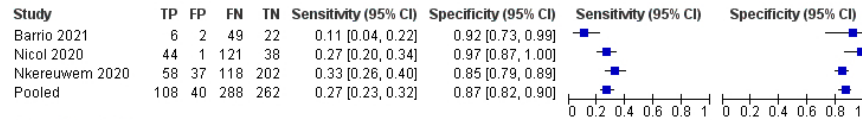

## AlereLAM vs MRS

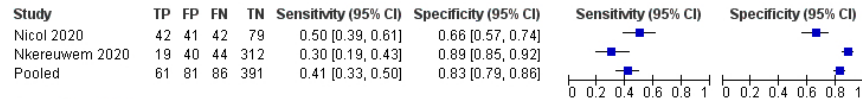

## AlereLAM vs CRS

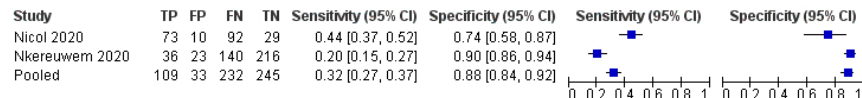

## FujiLAM vs MRS in HIV +

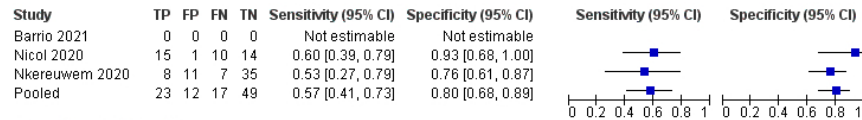

## AlereLAM vs MRS in HIV+

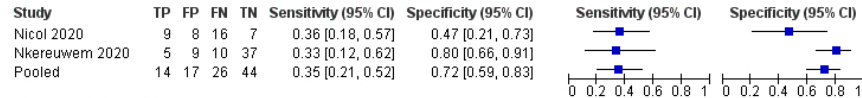

## FujiLAM vs MRS in HIV-

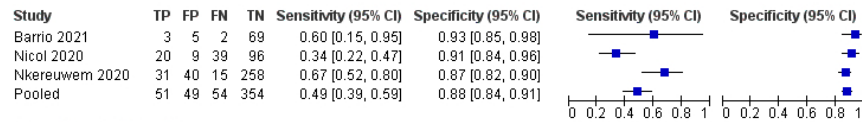

## AlereLAM vs MRS in HIV-

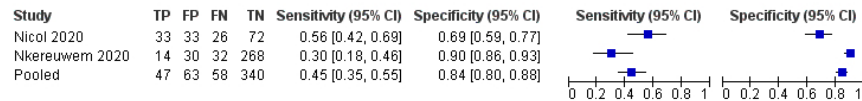

260x357mm (72 x 72 DPI)

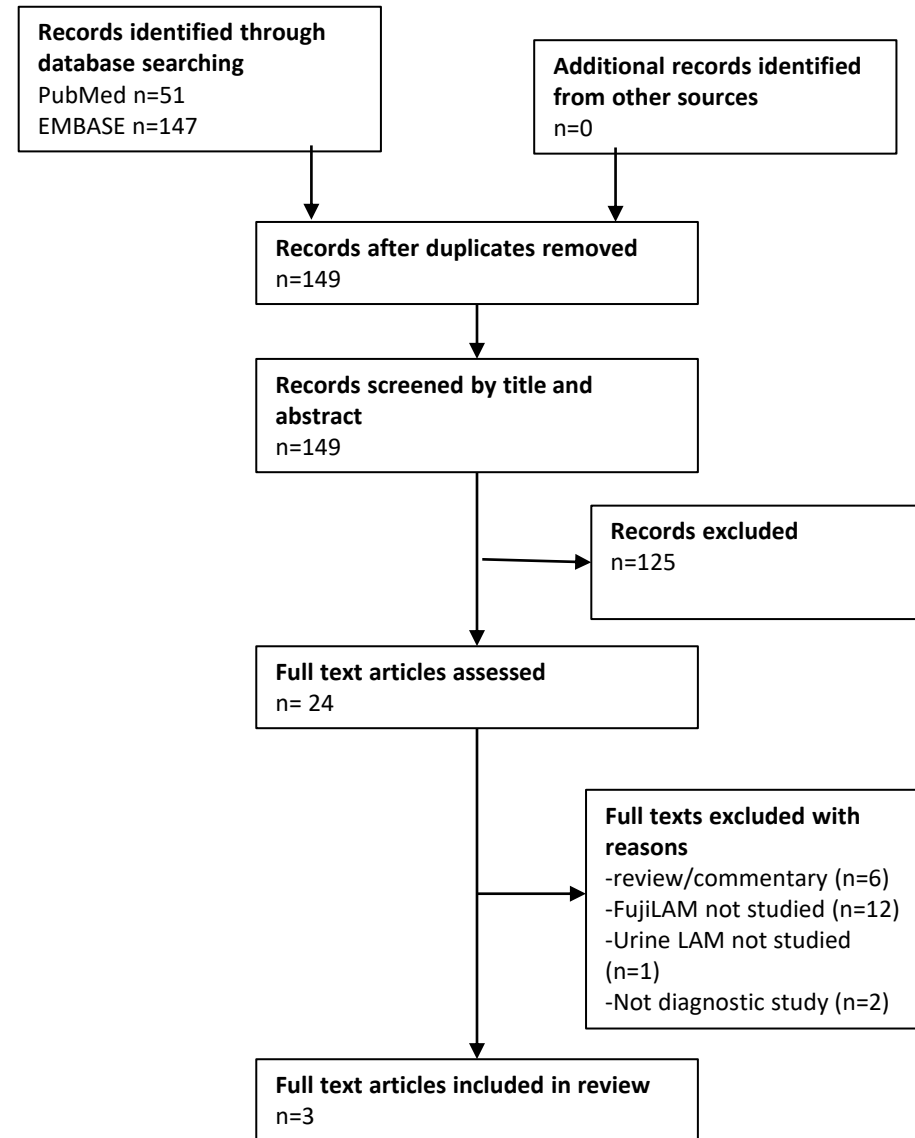

Supplemental Table 1: Diagnostic accuracy estimates as reported by authors

|                    | Nicol et al  |           |           |           |           |           |           |           |           | Nkereuwem et al. |           |           |           |           |           |           |           |           | Barrio et al. |           |           |           |           |           |       |           |        |  |
|--------------------|--------------|-----------|-----------|-----------|-----------|-----------|-----------|-----------|-----------|------------------|-----------|-----------|-----------|-----------|-----------|-----------|-----------|-----------|---------------|-----------|-----------|-----------|-----------|-----------|-------|-----------|--------|--|
|                    | Total<br>(n) | TP<br>(n) | FP<br>(n) | FN<br>(n) | TN<br>(n) | Sens<br>% | 95%CI     | Spec<br>% | 95%CI     | Total<br>(n)     | TP<br>(n) | FP<br>(n) | FN<br>(n) | TN<br>(n) | Sens<br>% | 95%CI     | Spec<br>% | 95%CI     | Total<br>(n)  | TP<br>(n) | FP<br>(n) | FN<br>(n) | TN<br>(n) | Sens<br>% | 95%CI | Spec<br>% | 95%CI  |  |
| <b>Overall</b>     |              |           |           |           |           |           |           |           |           |                  |           |           |           |           |           |           |           |           |               |           |           |           |           |           |       |           |        |  |
| <b>MRS</b>         |              |           |           |           |           |           |           |           |           |                  |           |           |           |           |           |           |           |           |               |           |           |           |           |           |       |           |        |  |
| FujiLAM            | 204          | 35        | 10        | 49        | 110       | 41.7      | 31.7–52.3 | 91.7      | 85.3–95.4 | 415              | 40        | 55        | 23        | 297       | 64.9      | 43.7–85.2 | 83.8      | 76.5–89.4 | 79            | 3         | 5         | 2         | 69        | 60        | 17–93 | 95        | 73-100 |  |
| AlereLAM           | 204          | 42        | 41        | 42        | 79        | 50.0      | 39.5–60.5 | 65.8      | 57.0–73.7 | 415              | 19        | 40        | 44        | 312       | 30.7      | 8.6–61.6  | 87.8      | 79.0–93.7 | -             | -         | -         | -         | -         | -         | -     | -         | -      |  |
| <b>CRS</b>         |              |           |           |           |           |           |           |           |           |                  |           |           |           |           |           |           |           |           |               |           |           |           |           |           |       |           |        |  |
| FujiLAM            | 204          | 44        | 1         | 121       | 38        | 26.7      | 20.5–33.9 | 97.4      | 86.8–99.5 | 415              | 58        | 37        | 118       | 202       | 32.9      | 24.6–41.9 | 83.3      | 71.8–91.7 | 73            | 6         | 2         | 49        | 22        | 11        | 523   | 92        | 72-99  |  |
| AlereLAM           | 204          | 73        | 10        | 92        | 29        | 44.2      | 36.9–51.9 | 74.4      | 58.9–85.4 | 415              | 36        | 23        | 140       | 216       | 20.2      | 12.3–29.4 | 90.0      | 81.6–95.6 | -             | -         | -         | -         | -         | -         | -     | -         | -      |  |
| <b>HIVpositive</b> |              |           |           |           |           |           |           |           |           |                  |           |           |           |           |           |           |           |           |               |           |           |           |           |           |       |           |        |  |
| <b>MRS</b>         |              |           |           |           |           |           |           |           |           |                  |           |           |           |           |           |           |           |           |               |           |           |           |           |           |       |           |        |  |
| FujiLAM            | 40           | 15        | 1         | 10        | 14        | 60.0      | 40.7–76.6 | 93.3      | 70.2–98.8 | 61               | 8         | 11        | 7         | 35        | 54.8      | 28.7–81.5 | 75.9      | 61.8–86.9 | -             | -         | -         | -         | -         | -         | -     | -         | -      |  |
| AlereLAM           | 40           | 9         | 8         | 16        | 7         | 36.0      | 20.2–55.5 | 46.7      | 24.8–69.9 | 61               | 5         | 9         | 10        | 37        | 36.6      | 13.8–70.4 | 80.4      | 66.3–91.0 | -             | -         | -         | -         | -         | -         | -     | -         | -      |  |
| <b>CRS</b>         |              |           |           |           |           |           |           |           |           |                  |           |           |           |           |           |           |           |           |               |           |           |           |           |           |       |           |        |  |
| FujiLAM            | -            | -         | -         | -         | -         | -         | -         | -         | -         | 61               | 14        | 5         | 30        | 12        | 31.9      | 18.9–47.0 | 71.4      | 46.8–91.5 | -             | -         | -         | -         | -         | -         | -     | -         | -      |  |
| AlereLAM           | -            | -         | -         | -         | -         | -         | -         | -         | -         | 61               | 13        | 1         | 31        | 16        | 29.3      | 16.3–44.6 | 92.8      | 72.6–99.8 | -             | -         | -         | -         | -         | -         | -     | -         | -      |  |
| <b>HIVnegative</b> |              |           |           |           |           |           |           |           |           |                  |           |           |           |           |           |           |           |           |               |           |           |           |           |           |       |           |        |  |
| <b>MRS</b>         |              |           |           |           |           |           |           |           |           |                  |           |           |           |           |           |           |           |           |               |           |           |           |           |           |       |           |        |  |
| FujiLAM            | 164          | 20        | 9         | 39        | 96        | 33.9      | 23.1–46.6 | 91.4      | 84.5–95.4 | 344              | 31        | 40        | 15        | 258       | 67.5      | 41.8–88.0 | 85.9      | 79.2–91.0 | -             | -         | -         | -         | -         | -         | -     | -         | -      |  |
| AlereLAM           | 164          | 33        | 33        | 26        | 72        | 55.9      | 43.3–67.8 | 68.6      | 59.2–76.7 | 344              | 14        | 30        | 32        | 268       | 26.6      | 1.2–66.4  | 89.1      | 80.7–94.7 | -             | -         | -         | -         | -         | -         | -     | -         | -      |  |
| <b>CRS</b>         |              |           |           |           |           |           |           |           |           |                  |           |           |           |           |           |           |           |           |               |           |           |           |           |           |       |           |        |  |
| FujiLAM            | -            | -         | -         | -         | -         | -         | -         | -         | -         | 344              | 43        | 28        | 86        | 187       | 33.2      | 23.7–43.5 | 85.7      | 76.2–92.2 | -             | -         | -         | -         | -         | -         | -     | -         | -      |  |
| AlereLAM           | -            | -         | -         | -         | -         | -         | -         | -         | -         | 344              | 23        | 21        | 106       | 194       | 15.3      | 1.7–37.5  | 89.3      | 81.0–94.7 | -             | -         | -         | -         | -         | -         | -     | -         | -      |  |
| <b>Age</b>         | <2yrs        |           |           |           |           |           |           |           |           |                  |           |           |           |           | <5yrs     |           |           |           |               |           |           |           |           |           |       |           |        |  |
| <b>MRS</b>         |              |           |           |           |           |           |           |           |           |                  |           |           |           |           |           |           |           |           |               |           |           |           |           |           |       |           |        |  |
| FujiLAM            | 59           | 9         | 7         | 13        | 30        | 40.9      | 23.3–61.3 | 81.1      | 65.8–90.5 | 194              | 16        | 35        | 10        | 133       | 61.8      | 36.6–85.5 | 78.5      | 69.1–86.0 | -             | -         | -         | -         | -         | -         | -     | -         | -      |  |
| AlereLAM           | 59           | 16        | 18        | 6         | 19        | 72.7      | 51.8–86.8 | 51.4      | 35.9–66.6 | 194              | 9         | 32        | 17        | 136       | 38.8      | 0.4–98.9  | 80.5      | 68.3–89.4 | -             | -         | -         | -         | -         | -         | -     | -         | -      |  |
| <b>CRS</b>         |              |           |           |           |           |           |           |           |           |                  |           |           |           |           |           |           |           |           |               |           |           |           |           |           |       |           |        |  |
| FujiLAM            | -            | -         | -         | -         | -         | -         | -         | -         | -         | 194              | 28        | 23        | 55        | 88        | 33.3      | 19.8–48.3 | 78.4      | 66.5–87.2 | -             | -         | -         | -         | -         | -         | -     | -         | -      |  |
| AlereLAM           | -            | -         | -         | -         | -         | -         | -         | -         | -         | 194              | 20        | 21        | 63        | 90        | 23.3      | 10.0–39.9 | 81.4      | 70.4–90.4 | -             | -         | -         | -         | -         | -         | -     | -         | -      |  |
| <b>Age</b>         | >2yrs        |           |           |           |           |           |           |           |           |                  |           |           |           |           | <5yrs     |           |           |           |               |           |           |           |           |           |       |           |        |  |
| <b>MRS</b>         |              |           |           |           |           |           |           |           |           |                  |           |           |           |           |           |           |           |           |               |           |           |           |           |           |       |           |        |  |
| FujiLAM            | 145          | 26        | 3         | 36        | 80        | 41.9      | 30.5–54.3 | 96.4      | 90.0–98.8 | 221              | 24        | 20        | 13        | 164       | 67.1      | 40.1–90.2 | 88.8      | 82.1–93.6 | -             | -         | -         | -         | -         | -         | -     | -         | -      |  |
| AlereLAM           | 145          | 26        | 23        | 36        | 60        | 41.9      | 30.5–54.3 | 72.3      | 61.8–80.8 | 221              | 10        | 8         | 27        | 176       | 26.9      | 7.2–54.8  | 95.2      | 89.7–98.3 | -             | -         | -         | -         | -         | -         | -     | -         | -      |  |
| <b>CRS</b>         |              |           |           |           |           |           |           |           |           |                  |           |           |           |           |           |           |           |           |               |           |           |           |           |           |       |           |        |  |
| FujiLAM            | -            | -         | -         | -         | -         | -         | -         | -         | -         | 221              | 30        | 14        | 63        | 114       | 32.7      | 22.4–44.4 | 88.2      | 76.0–96.4 | -             | -         | -         | -         | -         | -         | -     | -         | -      |  |
| AlereLAM           | -            | -         | -         | -         | -         | -         | -         | -         | -         | 221              | 16        | 2         | 77        | 126       | 17.3      | 9.6–27.4  | 98.1      | 93.7–99.9 | -             | -         | -         | -         | -         | -         | -     | -         | -      |  |

### Search strategy for supplementary materials

#### PubMed

((("child\*" [Title/Abstract] OR "infant\*" [Title/Abstract] OR "adolescent\*" [Title/Abstract] OR "paediatric\*" [Title/Abstract] OR "pediatric\*" [Title/Abstract]) AND ("LAM" [Title/Abstract] OR "lipoarabinomannan" [Title/Abstract])) AND (("tuberculos\*" [Title/Abstract] OR "TB" [Title/Abstract] OR MTB [Title/Abstract] OR PTB [Title/Abstract] OR mycobacterium tuberculosis [MeSH Terms] OR tuberculosis [MeSH Terms]))

#### EMBASE

1. mycobacterium tuberculosis/
2. tuberculosis/ or lung tuberculosis/
3. (tuberculos\*).mp.
4. MTB.mp.
5. Tb.mp.
6. (child\*).mp.
7. (infant\*).mp.
8. (adolescent\*).mp.
9. (paediatric\*).mp.
10. (pediatric\*).mp.
11. Lipoarabinomannan/
12. LAM.mp.
13. Lipoarabinomannan.mp.
14. 1 or 2 or 3 or 4 or 5
15. 6 or 7 or 8 or 9 or 10
16. 11 or 12 or 13
17. 14 and 15 and 16
18. (exp animals/ or nonhuman/) not human/
19. 17 not 18
20. conference\*.pt
21. 19 not 20

# BMJ Paediatrics Open

## FujiLAM for the diagnosis of childhood tuberculosis: A systematic review

|                               |                                                                                                                                                                                                                                                                                                                                                                                                                                                                                                                                                                                                                       |
|-------------------------------|-----------------------------------------------------------------------------------------------------------------------------------------------------------------------------------------------------------------------------------------------------------------------------------------------------------------------------------------------------------------------------------------------------------------------------------------------------------------------------------------------------------------------------------------------------------------------------------------------------------------------|
| Journal:                      | <i>BMJ Paediatrics Open</i>                                                                                                                                                                                                                                                                                                                                                                                                                                                                                                                                                                                           |
| Manuscript ID                 | bmjpo-2022-001447.R1                                                                                                                                                                                                                                                                                                                                                                                                                                                                                                                                                                                                  |
| Article Type:                 | Original research                                                                                                                                                                                                                                                                                                                                                                                                                                                                                                                                                                                                     |
| Date Submitted by the Author: | 21-Apr-2022                                                                                                                                                                                                                                                                                                                                                                                                                                                                                                                                                                                                           |
| Complete List of Authors:     | Olbrich, Laura; Ludwig Maximilians University Munich, Division of Infectious Diseases and Tropical Medicine, University Hospital, LMU Munich; University of Oxford, Department of Paediatrics<br>Khambati, Nisreen; University of Oxford, Department of Paediatrics<br>Bijker, Else Margreet; University of Oxford, Department of Paediatrics<br>Ruhwald, Morten; FIND<br>Heinrich, Nobert; Ludwig-Maximilians-Universitat Munchen, Division of Infectious Diseases and Tropical Medicine, University Hospital, LMU Munich<br>Song, Rinn; University of Oxford, Department of Paediatrics; Boston Children's Hospital |
| Keywords:                     | Epidemiology, Statistics, Microbiology                                                                                                                                                                                                                                                                                                                                                                                                                                                                                                                                                                                |
|                               |                                                                                                                                                                                                                                                                                                                                                                                                                                                                                                                                                                                                                       |

SCHOLARONE™  
Manuscripts



I, the Submitting Author has the right to grant and does grant on behalf of all authors of the Work (as defined in the below author licence), an exclusive licence and/or a non-exclusive licence for contributions from authors who are: i) UK Crown employees; ii) where BMJ has agreed a CC-BY licence shall apply, and/or iii) in accordance with the terms applicable for US Federal Government officers or employees acting as part of their official duties; on a worldwide, perpetual, irrevocable, royalty-free basis to BMJ Publishing Group Ltd ("BMJ") its licensees and where the relevant Journal is co-owned by BMJ to the co-owners of the Journal, to publish the Work in this journal and any other BMJ products and to exploit all rights, as set out in our [licence](#).

The Submitting Author accepts and understands that any supply made under these terms is made by BMJ to the Submitting Author unless you are acting as an employee on behalf of your employer or a postgraduate student of an affiliated institution which is paying any applicable article publishing charge ("APC") for Open Access articles. Where the Submitting Author wishes to make the Work available on an Open Access basis (and intends to pay the relevant APC), the terms of reuse of such Open Access shall be governed by a Creative Commons licence – details of these licences and which [Creative Commons](#) licence will apply to this Work are set out in our licence referred to above.

Other than as permitted in any relevant BMJ Author's Self Archiving Policies, I confirm this Work has not been accepted for publication elsewhere, is not being considered for publication elsewhere and does not duplicate material already published. I confirm all authors consent to publication of this Work and authorise the granting of this licence.

# FujiLAM for the diagnosis of childhood tuberculosis: A systematic review

## *Abbreviated & running title: FujiLAM for diagnosis of childhood TB*

### Authors and Affiliations

Laura Olbrich, MD \*<sup>1,2,3</sup>; Nisreen Khambati, MD \*<sup>3</sup>; Else Margreet Bijker, MD PhD<sup>3</sup>, Morten Ruhwald, MD PhD<sup>4</sup>, Norbert Heinrich, MD<sup>1,2</sup>, Rinn Song, MD<sup>3,5</sup>

\* Joint first author

1 Division of Infectious Diseases and Tropical Medicine, University Hospital, LMU Munich, Germany;

2 German Centre for Infection Research (DZIF), Partner Site Munich, Munich, Germany;

3 Oxford Vaccine Group, Department of Paediatrics, University of Oxford, Oxford, UK

4 FIND, the Global Alliance for Diagnostics. Chemin des Mines 9, 1201 Geneva, Switzerland

5 Division of Infectious Diseases, Boston Children's Hospital, Boston, Massachusetts, USA)

### Key words

Childhood TB, FujiLAM, lipoarabinomannan, diagnosis

### Corresponding Author

LMU Klinikum, Division of Infectious Diseases and Tropical Medicine

Leopoldstraße 5, 80802 Munich, Germany

Phone +49 89 4400-59803, Fax +49 89 336038

[olbrich@lrz.uni-muenchen.de](mailto:olbrich@lrz.uni-muenchen.de)

### Funding

FINDs work to support development and manufacturer independent evaluations in clinical trials of the FujiFilm SILVAMP TB test is made possible through a grant from the Global Health Innovative Technology (GHIT) Fund (Japan) (grant number G2015- 201).

### Conflicts

MR is employed by FIND, the Global Alliance for Diagnostics. FIND is a not-for-profit NGO that collaborates in partnerships to develop, evaluate and implement new diagnostics for LMIC. FIND has product evaluation agreements with FujiFilm and several other private sector companies that design diagnostics and related products for treatment of tuberculosis and other diseases. These agreements strictly define FIND's independence and neutrality vis-à-vis the companies whose products get evaluated and describe roles and responsibilities.

**“What is already known on this topic”**

- Despite recent advances, paediatric TB remains difficult to diagnose and accurate point-of-care tests that use easily obtainable non-sputum specimens are urgently needed.
- Lateral flow tests detecting urine lipoarabinomannan (LAM), including the original AlereLAM and the recently developed FujiLAM, could improve diagnosis in children in low-resource settings.
- FujiLAM’s analytic sensitivity for the diagnosis of pulmonary TB has been observed to be higher compared to AlereLAM in adults.

**“What this study adds”**

- Using a microbiological reference standard, the sensitivity of FujiLAM for diagnosing paediatric TB ranged from 42% to 63%, whereas specificity was higher, ranging from 84% to 93%.
- Gaps in studies to be prioritised in forthcoming evaluations include prospective testing of fresh specimens, subgroup analyses for children living with HIV, and direct comparison with AlereLAM.

**“How this study might affect research, practice or policy”**

- Whilst more paediatric studies are needed, high specificity and use of an easy-to-obtain specimen indicates that FujiLAM could be a useful rule-in test for TB.



## ABSTRACT

### Background

Childhood tuberculosis (TB) remains underdiagnosed. The novel lateral flow FujiLAM assay detects lipoarabinomannan (LAM) in urine, but data on performance in children remain limited.

### Methods

We conducted a systematic review assessing the diagnostic performance of FujiLAM for diagnosing paediatric TB. The last search was conducted in November 2021.

### Results

We included three studies with data from 698 children for FujiLAM. For FujiLAM, sensitivity using a microbiological reference standard (MRS) were 60% (95%CI 15-95), 42% (95%CI 31-53), and 63% (95%CI 50-75), respectively. Specificity was 93% (95%CI 85-98), 92% (95%CI 85-96), and 84% (95%CI 80-88). Using a composite reference standard (CRS), sensitivity was 11% (95%CI 4-22), 27% (95%CI 20-34), and 33% (95%CI 26-40), and specificity was 92% (95%CI 73-99), 97% (95%CI 87-100), and 85% (95%CI 79-89). Subgroup analyses for sensitivity of FujiLAM in children living with HIV (CLHIV) compared to those who were negative for HIV infection were inconsistent across studies. Among CLHIV, sensitivity appeared higher in those with greater immunosuppression, although wide confidence intervals limit the interpretation of observed differences. Meta-analysis was not performed due to considerable study heterogeneity.

### Conclusion

The high specificity of FujiLAM demonstrates its potential as a point-of-care (POC) rule-in test for diagnosing paediatric TB. As an instrument-free POC test that uses an easy-to-obtain specimen, FujiLAM could significantly improve TB diagnosis in children in low-resource settings, however the small number of studies available highlight that further data is needed. Key priorities to be addressed in forthcoming paediatric evaluations include prospective head-to head comparisons with AlereLAM

79 using fresh specimens, specific subgroup analysis in CLHIV, and extrapulmonary disease and  
1  
2  
30 studies in different geographical locations.  
4  
5  
6  
7  
8  
9  
10  
11  
12  
13  
14  
15  
16  
17  
18  
19  
20  
21  
22  
23  
24  
25  
26  
27  
28  
29  
30  
31  
32  
33  
34  
35  
36  
37  
38  
39  
40  
41  
42  
43  
44  
45  
46  
47  
48  
49  
50  
51  
52  
53  
54  
55  
56  
57  
58  
59  
60

Confidential: For Review Only

## INTRODUCTION

Childhood tuberculosis (TB) is a major contributor to morbidity and mortality worldwide (1). Children below five years are disproportionately affected in case load and mortality, contributing to approximately 50% of all paediatric TB cases (2) and 80% of deaths (2, 3). The burden and mortality of paediatric TB is likely underestimated, as confirmation of disease remains challenging. There is an unmet need for accurate and easy-to-use diagnostic tests for children.

The World Health Organization (WHO) has defined target product profiles (TPP) for new non-sputum-based point-of-care (POC) diagnostics for TB and their use in children (4). Promising candidates include lateral flow assays detecting lipoarabinomannan (LAM), a glycolipid found in the mycobacterial cell-wall, secreted in urine. The first commercially available test was the Alere Determine TB LAM Ag (AlereLAM; Abbott, Palatine, IL, USA), which is the only instrument-free POC LAM test recommended by the WHO (5, 6). According to a systematic review, pooled sensitivity of the AlereLAM is 42% in adults (7), increasing to 54% in PLHIV with CD4  $\leq$ 100 cells/ $\mu$ L (7, 8). Recently, Fujifilm developed the Fujifilm SILVAMP TB LAM assay (FujiLAM; Fujifilm, Tokyo, Japan), a novel test detecting LAM in urine using high affinity monoclonal antibodies and silver amplification (9, 10). Initial studies in hospitalised adults with HIV showed a higher diagnostic sensitivity of 70% for TB compared to AlereLAM (9). A recent modelling study also suggested that conducting FujiLAM in adults presenting with TB symptoms averted 30% of TB deaths and 18% of incident cases between 2020 and 2035 (11).

Compared to the increasing number of publications in adults (5, 8, 12-15), few studies have explored the performance of FujiLAM in children. In children, diagnostic yield, which represents both the diagnostic accuracy of a test and feasibility of obtaining a specimen (16), is improved by the availability of a specimen such as urine, compared to sputum. FujiLAM could therefore have a positive impact to reduce the burden of childhood TB. Here, we conducted a systematic review on the diagnostic performance of FujiLAM in children for diagnosing TB.

## **METHODS**

The protocol for this systematic review was registered at PROSPERO (CRD42021270761). Reporting was according to the Preferred Reporting Items for Systematic Reviews and Meta-Analyses (PRISMA) guidelines (17).

### **Search strategy and study selection**

We identified studies via PubMed and EMBASE and registration of past and ongoing studies (clinicaltrials.gov, WHO trial registry). Additionally, we consulted experts in TB diagnostics to identify relevant publications. There were no restrictions on language or time of publication. The full search strategy incorporated terms (text words, keywords, and medical subject headings) related to lipoarabinomannan, tuberculosis, and children, and is presented in the Supplementary Material. The last search was conducted on 10th November 2021.

Original studies that reported diagnostic accuracy estimations on the performance of FujiLAM in children (defined as less than 18 years) for TB were included. We excluded animal studies, conference proceedings, editorials, and reviews. The eligibility assessment was performed by two investigators (LO, NK), who independently screened titles and abstracts followed by full text review. Any disagreement was resolved through discussion with a third reviewer.

### **Risk of bias assessment**

Two independent investigators (LO, NK) assessed the quality of included studies using the Quality Assessment of Diagnostic Accuracy Studies 2 (QUADAS-2) framework (18), all standard items were applied (19). Consensus was achieved through discussion and consultation with a third reviewer if necessary. RevMan (version 5, The Cochrane Collaboration, 2020) (20) was used for visualisation.

### **Data collection**

The following information was extracted from the original publications by LO and NK independently with any discrepancies discussed with a third reviewer:

- 131 i. Characteristics of cohort (including age, clinical presentation, country of origin, HIV-  
132 status)
- 133 ii. In- and exclusion criteria
- 134 iii. Reference standards
- 135 iv. Diagnostic accuracy measures

### 136 **Summary measures and data analysis**

137 The outcome measures were sensitivity and specificity of FujiLAM to diagnose active TB in children,  
138 using a microbiological reference standard (MRS; culture and/or WHO-endorsed nucleic acid  
139 amplification tests - NAAT) or a composite reference standard (CRS). Sensitivity was defined as  
140 probability of a positive test in diseased children. Specificity represented the probability of a negative  
141 test result when the disease was absent. Point estimates and confidence intervals were calculated  
142 using the raw data provided by the original publication with the statistical software of RevMan  
143 (version 5, The Cochrane Collaboration, 2020) (20).

### 144 **Patient and Public Involvement**

145 Being a systematic review, this research was done without patient or public involvement. As a  
146 secondary analysis, no ethical approval was sought.

## 148 **RESULTS**

### 149 **Study results**

150 149 unique records were identified from which 24 full texts were reviewed for eligibility and 3 studies  
151 met inclusion criteria (**Supplemental figure 1**). No further registered trials or publications on preprint  
152 servers were identified. **Table 1** shows the study characteristics. The clinical settings differed; two  
153 studies were conducted in sub-Saharan Africa and one in Haiti. Studies also varied in the healthcare  
154 level for recruitment and proportion of children with microbiologically confirmed TB. In all studies,

enrolment was prospective, but FujiLAM was evaluated on biobanked samples. Due to study heterogeneity and the small number of studies, a meta-analysis was not done.

## Quality

**Figure 1** summarises the risk of bias and applicability of included studies, there were no disagreements between reviewers. Regarding patient selection, one study enriched their cohort by specifically including known microbiologically confirmed CLHIV; therefore risk of bias was deemed unclear (21). Another study had a high risk of bias because the authors did not explicitly state whether samples were taken consecutively and also recruited healthy controls, which can overestimate diagnostic performance (22). The index test domain was at low risk of bias, with all studies reporting blinded interpretation by two readers. Due to the inherent challenges of microbiological investigations in confirming TB disease in children (23-25), two studies had an unclear risk of bias for correctly classifying the target condition, despite including culture (21, 26). One study was judged as having a high risk of bias as the MRS only included Xpert MTB/RIF and not culture (22). Risk of bias was low for most studies regarding patient flow except for one study in which only certain patients received the MRS. Full details of the QUADAS-2 assessment are included in

## Supplementary Table 1.

### Test accuracy

**Table 2** outlines the in- and exclusion criteria, microbiological investigations (specimen collected and tests performed), reference standards, and case definitions of studies. All studies applied an MRS, being roughly equivalent to the National Institutes of Health (NIH) case definition of “confirmed TB” (25), requiring microbiological confirmation of MTB, although underlying tests and testing algorithms varied between the studies. CRS were also used, with both microbiologically confirmed and clinically diagnosed TB defined as CRS positive, however, underlying clinical information varied between studies.

In total, 698 children were included in this analysis. The sensitivity and specificity of index tests across the studies are shown in **Table 3**, **Table 4**, and **Figure 2**. Two studies reported on invalid

181 results, which were excluded from final analyses. One study reported n=1 invalid result (26), another  
182 stated n=22 invalid results (21), which reduced to n=4 after re-testing.

### 183 *Microbiological reference standard (MRS)*

184 When applying the MRS, sensitivity of FujiLAM was estimated at 60% (95%CI 15-95) (22), 42%  
185 (95%CI 31–53) (21), and 63% (95%CI 50–75) (26) for the three studies respectively. Confidence  
186 intervals were wide and overlapped for all three studies. In contrast, specificity estimations were  
187 more consistent across studies, with 93% (95%CI 85-98) (22), 92% (95%CI 85–96) (21), and 84%  
188 (95%CI 80–88) (26) (**Figure 2**). Two studies performed head-to-head comparisons with AlerelAM  
189 (21, 26). Nkereuwem et al., found that FujiLAM had a sensitivity more than double of AlerelAM  
190 (31%, 95%CI 9-62), whilst maintaining a similarly high specificity (88% 95%CI 79-94) (26). In the  
191 study by Nicol et al, sensitivity of AlerelAM was slightly higher (50%, 95%CI 40-61), although  
192 specificity was much lower (66%, 95% CI 57-74) (21).

### 193 *Composite reference standard (CRS)*

194 When applying the CRS, sensitivity of FujiLAM was 11% (95%CI -22) (22), 27% (95%CI 20-34) (21),  
195 and 33% (95%CI 26-40) (26). Sensitivity was pronouncedly lower than for MRS, with differences of  
196 49% (22), 15% (21), and 30% (26). Specificity estimates were closer to MRS with 92% (95%CI 73-  
197 99) (22), 97% (95%CI 87-100) (21), and 85% (95%CI 79-89) (26).

### 198 *Results stratified by HIV*

199 One study excluded CLHIV, therefore only two studies assessed performance in this subgroup. Data  
200 only allowed for comparison to the MRS (**Figure 2**). For CLHIV, sensitivity of FujiLAM was 60%  
201 (95%CI 39-79) (21) and 53% (95%CI 27-79) (26). Specificity in CLHIV was 93% (95%CI 68-100)  
202 (21) and 76% (95%CI 61-87) (26). One study demonstrated test performance stratified by CD4-  
203 count, suggesting a higher sensitivity of 80% (95%CI 38-96) in children with CD4-counts <200/uL,  
204 compared to 55% (95%CI 34-74) in children with CD4-counts >200/uL (21). In contrast, specificity  
205 was higher in children with CD4-counts >200/uL (100%, 95%CI 74-100; compared to 75%, 95%CI  
206 30-95) (21) For both performance estimates, confidence intervals were very wide and overlapped.



In HIV-negative children, estimates on FujiLAM performance differed considerably. While one study reported a lower sensitivity, 34% (95%CI 22-47) versus 60% (95%CI 39-79) in CLHIV (21), another stated a sensitivity of 67% (95%CI 52-80) compared to 53% (95%CI 27-79) in CLHIV (26), but again confidence intervals overlapped. Specificity estimates for HIV negative children (91% (95%CI 8-96) (21), and 87% (95%CI 82-90) (26) were overall comparable to those in CLHIV.

## DISCUSSION

We examined the accuracy of the recently developed FujiLAM to diagnose paediatric TB across the available literature. While there are numerous studies evaluating FujiLAM for diagnosing TB in adults (5, 8, 12-15), there are only three paediatric publications (21, 22, 26). The estimated sensitivities ranged from 42% to 63%, whereas specificity was higher, ranging from 84% to 93%, when applying an MRS. Although sensitivity targets for the WHO TPP for a diagnostic (>66%) or triage (>90%) test were not met, the high specificity of FujiLAM across all studies is promising, especially given the rapidity and ease of use. Urine can mostly be obtained within the first 24h of admission, compared to sputum where collection is difficult, and benefits for diagnostic yield are likely (27, 28). FujiLAM could have particular utility when used in combination within a diagnostic algorithm to rule-in TB in children with a high pre-test probability, like CLHIV or malnourished children in high endemic settings (29).

The estimated sensitivity of FujiLAM here is comparable to results from a multicenter diagnostic accuracy study in HIV-negative adults (53%) (5). In this study, a strong association of sensitivity with bacterial load was observed, which likely impacts performance in children, as they generally have paucibacillary disease. Diagnostic evaluations for TB in children remain difficult, as available reference standards are imperfect. While the MRS might miss TB cases, a CRS potentially includes children not ill with TB, both hampering the interpretability of sensitivity estimates. Using an MRS will underestimate the number of children with TB and therefore overestimate the number of true negatives, as MRS can misclassify paediatric TB positive cases as negative cases. How studies define their reference standards may also contribute to heterogeneity in accuracy estimates. While



all studies applied the NIH clinical case definitions for intrathoracic tuberculosis (25), underlying clinical and microbiological investigations varied. For example, one study solely performed NAAT but not culture, and only in cases with positive smear microscopy or abnormal chest Xray, potentially underestimating sensitivity (22). This heterogeneity of classifications outlines the necessity of applying standardised diagnostic classifications rigorously to enable cross-comparisons and meta-analyses (23-25).

Patient cohorts (and therefore pre-test probabilities) also differed considerably between studies. Participants were recruited from different levels of health care, reflecting real-life variation, which is favorable for the generalisability of results (30). However, all tests were performed on biobanked specimen in research laboratory settings. Broger and colleagues compared FujiLAM read-outs of fresh vs. biobanked samples from adult patients, and while categorical agreement was high, a reduction of positive percentage agreement was observed (31). Studies using FujiLAM on fresh specimens, prospectively, and in real-life settings will need to be conducted in children.

Important subgroups for diagnostics tests include CLHIV and the very young, who are at high risk of dying from TB (2). We found that the two studies reporting FujiLAM's accuracy in CLHIV had contrasting results, with reliable conclusions difficult to draw due to small numbers and overlapping confidence intervals. Analyses stratified by age were only performed in the African studies, but different age cut-offs were used (21, 26), hence direct comparison was not possible. Estimates in the original publications suggest a similar sensitivity, but a decrease in specificity in younger children. An explanation could be contamination in nappy-wearing children, with specificity potentially compromised due to corynebacteria, dust, soil, and stool (29, 32, 33). Future studies should follow strict collection criteria to prevent contamination and describe them in detail. Finally, data on LAM-assays in extrapulmonary cases (EPTB) remain scarce and reported sensitivities of FujiLAM range from 47-94% in adults (34). Extrapulmonary manifestations are more common in children, but only one study recruited those cases and did not show subgroup analysis (22).

The FujiLAM assay was developed to improve the sensitivity of AlereLAM, therefore comparison between the two is scientifically and clinically relevant. Only two studies performed paired head-to-

head comparisons; whereas FujiLAM sensitivity was significantly higher compared to AlereLAM in one study using an MRS, (26) AlereLAM was more sensitive in another (21). Moreover, within each study, most confidence intervals between the two tests overlapped, suggesting a lack of evidence for test superiority. The range of estimates for sensitivity and specificity for FujiLAM in CLHIV in this systematic review against a MRS (53-60% and 76-93%, respectively) was also similar to estimates for AlereLAM from a Cochrane review of HIV positive children (42-56% and 80-95%) (7), the group in whom AlereLAM is currently recommended by the WHO (35). Since these indirect comparisons between different studies can be biased by differences in population and setting, more studies that directly compare AlereLAM and FujiLAM in paired analyses are needed to understand whether FujiLAM could replace AlereLAM as a POC test in children.

All included studies, and thus this review, have limitations and data gaps. The geographical distribution of cohorts included sub-Saharan Africa and Haiti and results may not be generalisable to other regions. Important subgroup analyses could not be performed due to unavailability of data and variable application of definitions, such as test performance in EPTB, CD4-count in CLHIV (except for one study), and specific age-groups. Finally, no comment could be made on the impact of FujiLAM on clinical outcomes such as mortality reduction, as has been shown for AlereLAM in hospitalised HIV-infected adults (36).

This review summarises the current evidence of FujiLAM, with the high specificity demonstrating its potential as a POC rule-in test for diagnosing paediatric TB. It reflects the current state of knowledge, highlighting that more data on FujiLAM in children are needed to understand the diagnostic value of this test in different groups at scale and suggests the priorities to be addressed in forthcoming evaluations. In particular, the need for prospective assessments that directly compare FujiLAM to AlereLAM in real-life settings, recruitment from several geographical regions, and subgroup analyses focusing on CLHIV and EPTB.

## REFERENCES

1. Dodd PJ, Yuen CM, Sismanidis C, Seddon JA, Jenkins HE. The global burden of tuberculosis mortality in children: a mathematical modelling study. *The Lancet Global Health*. 2017;5(9):e898-e906. doi: 10.1016/S2214-109X(17)30289-9.
2. Organization WH. Roadmap towards ending TB in children and adolescents 2018.
3. Frost WH. The age selection of mortality from tuberculosis in successive decades. *American Journal of Epidemiology*. 1939;30(3):91-6.
4. Organization WH. High-priority target product profiles for new tuberculosis diagnostics: report of a consensus meeting. Geneva, Switzerland; 2014. 2014.
5. Broger T, Nicol MP, Sigal GB, Gotuzzo E, Zimmer AJ, Surtie S, Caceres-Nakiche T, Mantsoki A, Reipold EI, Székely R, Tsionsky M, van Heerden J, Plisova T, Chikamatsu K, Lowary TL, Pinter A, Mitarai S, Moreau E, Schumacher SG, Denkinge CM. Diagnostic accuracy of 3 urine lipoarabinomannan tuberculosis assays in HIV-negative outpatients. *J Clin Invest*. 2020;130(11):5756-64. Epub 2020/07/22. doi: 10.1172/jci140461. PubMed PMID: 32692731; PMCID: PMC7598043.
6. Organization WH. WHO consolidated guidelines on tuberculosis: module 3: diagnosis—rapid diagnostics for tuberculosis detection: web annex 4: evidence synthesis and analysis 2020.
7. Bjerrum S, Schiller I, Dendukuri N, Kohli M, Nathavitharana RR, Zwerling AA, Denkinge CM, Steingart KR, Shah M. Lateral flow urine lipoarabinomannan assay for detecting active tuberculosis in people living with HIV. *Cochrane Database of Systematic Reviews*. 2019(10).
8. Bjerrum S, Broger T, Székely R, Mitarai S, Opintan JA, Kenu E, Lartey M, Addo KK, Chikamatsu K, Macé A, Schumacher SG, Moreau E, Shah M, Johansen IS, Denkinge CM. Diagnostic Accuracy of a Novel and Rapid Lipoarabinomannan Test for Diagnosing Tuberculosis Among People With Human Immunodeficiency Virus. *Open Forum Infect Dis*. 2020;7(1):ofz530. Epub 2020/01/25. doi: 10.1093/ofid/ofz530. PubMed PMID: 31976353; PMCID: PMC6966242.
9. Broger T, Sossen B, du Toit E, Kerkhoff AD, Schutz C, Reipold EI, Ward A, Barr DA, Macé A, Trollip A. Novel lipoarabinomannan point-of-care tuberculosis test for people with HIV: a diagnostic accuracy study. *The Lancet Infectious Diseases*. 2019;19(8):852-61.
10. Sigal GB, Pinter A, Lowary TL, Kawasaki M, Li A, Mathew A, Tsionsky M, Zheng RB, Plisova T, Shen K, Katsuragi K, Choudhary A, Honnen WJ, Nahid P, Denkinge CM, Broger T. A Novel Sensitive Immunoassay Targeting the 5-Methylthio-d-Xylofuranose-Lipoarabinomannan Epitope Meets the WHO's Performance Target for Tuberculosis Diagnosis. *J Clin Microbiol*. 2018;56(12). Epub 2018/09/28. doi: 10.1128/jcm.01338-18. PubMed PMID: 30257899; PMCID: PMC6258851.
11. Ricks S, Denkinge CM, Schumacher SG, Hallett TB, Arinaminpathy N. The potential impact of urine-LAM diagnostics on tuberculosis incidence and mortality: A modelling analysis. *PLoS medicine*. 2020;17(12):e1003466.
12. Kerkhoff AD, Sossen B, Schutz C, Reipold EI, Trollip A, Moreau E, Schumacher SG, Burton R, Ward A, Nicol MP. Diagnostic sensitivity of SILVAMP TB-LAM (FujiLAM) point-of-care urine assay for extra-pulmonary tuberculosis in people living with HIV. *European Respiratory Journal*. 2020;55(2).
13. Broger T, Nicol MP, Székely R, Bjerrum S, Sossen B, Schutz C, Opintan JA, Johansen IS, Mitarai S, Chikamatsu K, Kerkhoff AD, Macé A, Ongarello S, Meintjes G, Denkinge CM, Schumacher SG. Diagnostic accuracy of a novel tuberculosis point-of-care urine lipoarabinomannan assay for people living with HIV: A meta-analysis of individual in- and outpatient data. *PLoS Med*. 2020;17(5):e1003113. Epub 2020/05/02. doi: 10.1371/journal.pmed.1003113. PubMed PMID: 32357197; PMCID: PMC7194366 following competing interests: TB, SGS, AM, SO, RS and CMD were previously or are currently employed by FIND. TB reports a patent in the field of lipoarabinomannan detection. CMD is a member of PLOS Medicine's Editorial Board. The rest of the authors declare no competing interests associated with this manuscript. The corresponding author had full access to all the data in the study and had final responsibility for the decision to submit for publication.
14. Muyoyeta M, Kerkhoff AD, Chilukutu L, Moreau E, Schumacher SG, Ruhwald M. Diagnostic accuracy of a novel point-of-care urine lipoarabinomannan assay for the detection of tuberculosis among adult outpatients in Zambia: a prospective cross-sectional study. *European Respiratory Journal*. 2021.
15. Ignatius EH, Cohen KA, Bishai WR. Getting to the point in point-of-care diagnostics for tuberculosis. *The Journal of Clinical Investigation*. 2020;130(11).
16. Lawn SD, Kerkhoff AD, Burton R, Schutz C, Boule A, Vogt M, Gupta-Wright A, Nicol MP, Meintjes G. Diagnostic accuracy, incremental yield and prognostic value of Determine TB-LAM for routine diagnostic testing for tuberculosis in HIV-infected patients requiring acute hospital admission in South Africa: a prospective cohort. *BMC Medicine*. 2017;15(1):67. doi: 10.1186/s12916-017-0822-8.

17. Moher D, Altman DG, Liberati A, Tetzlaff J. PRISMA statement. *Epidemiology (Cambridge, Mass)*. 2011;22(1):128.
18. Whiting PF, Rutjes AW, Westwood ME, Mallett S, Deeks JJ, Reitsma JB, Leeflang MM, Sterne JA, Bossuyt PM. QUADAS-2: a revised tool for the quality assessment of diagnostic accuracy studies. *Ann Intern Med*. 2011;155(8):529-36. Epub 2011/10/19. doi: 10.7326/0003-4819-155-8-201110180-00009. PubMed PMID: 22007046.
19. Whiting P, Rutjes AW, Reitsma JB, Bossuyt PM, Kleijnen J. The development of QUADAS: a tool for the quality assessment of studies of diagnostic accuracy included in systematic reviews. *BMC Med Res Methodol*. 2003;3:25. doi: 10.1186/1471-2288-3-25. PubMed PMID: 14606960; PMCID: 305345.
20. Collaboration TC. Review Manager (RevMan). Version 5.4.1 ed2020.
21. Nicol MP, Schumacher SG, Workman L, Broger T, Baard C, Prins M, Bateman L, du Toit E, van Heerden J, Szekely R, Zar HJ, Denkinger CM. Accuracy of a novel urine test, Fujifilm SILVAMP TB LAM, for the diagnosis of pulmonary tuberculosis in children. *Clin Infect Dis*. 2020. Epub 2020/08/08. doi: 10.1093/cid/ciaa1052. PubMed PMID: 32761178.
22. Comella-del-Barrio P, Molina-Moya B, Gautier J, Villar-Hernández R, Doresca MJC, Sallés-Mingels B, Canales-Aliaga L, Narcisse M, Pérez-Porcuna TM, Creswell J. Diagnostic Performance of the Fujifilm SILVAMP TB-LAM in Children with Presumptive Tuberculosis. *Journal of Clinical Medicine*. 2021;10(9):1914.
23. Cuevas LE, Browning R, Bossuyt P, Casenghi M, Cotton MF, Cruz AT, Dodd LE, Drobniewski F, Gale M, Graham SM, Grzemska M, Heinrich N, Hesselning AC, Huebner R, Jean-Philippe P, Kabra SK, Kampmann B, Lewinsohn D, Li M, Lienhardt C, Mandalakas AM, Marais BJ, Menzies HJ, Montepiedra G, Mwansambo C, Oberhelman R, Palumbo P, Russek-Cohen E, Shapiro DE, Smith B, Soto-Castellares G, Starke JR, Swaminathan S, Wingfield C, Worrell C. Evaluation of Tuberculosis Diagnostics in Children: 2. Methodological Issues for Conducting and Reporting Research Evaluations of Tuberculosis Diagnostics for Intrathoracic Tuberculosis in Children. Consensus From an Expert Panel. *The Journal of infectious diseases*. 2012;205 Suppl 2:S209-15. Epub 2012/04/06. doi: jir879 [pii] 10.1093/infdis/jir879. PubMed PMID: 22476719.
24. Graham SM, Ahmed T, Amanullah F, Browning R, Cardenas V, Casenghi M, Cuevas LE, Gale M, Gie RP, Grzemska M, Handelsman E, Hatherill M, Hesselning AC, Jean-Philippe P, Kampmann B, Kabra SK, Lienhardt C, Lighter-Fisher J, Madhi S, Makhene M, Marais BJ, McNeeley DF, Menzies H, Mitchell C, Modi S, Mofenson L, Musoke P, Nachman S, Powell C, Rigaud M, Rouzier V, Starke JR, Swaminathan S, Wingfield C. Evaluation of tuberculosis diagnostics in children: 1. Proposed clinical case definitions for classification of intrathoracic tuberculosis disease. Consensus from an expert panel. *The Journal of infectious diseases*. 2012;205 Suppl 2:S199-208. doi: 10.1093/infdis/jis008. PubMed PMID: 22448023; PMCID: 3334506.
25. Graham SM, Cuevas LE, Jean-Philippe P, Browning R, Casenghi M, Detjen AK, Gnanashanmugam D, Hesselning AC, Kampmann B, Mandalakas A, Marais BJ, Schito M, Spiegel HM, Starke JR, Worrell C, Zar HJ. Clinical Case Definitions for Classification of Intrathoracic Tuberculosis in Children: An Update. *Clin Infect Dis*. 2015;61Suppl 3:S179-87. doi: 10.1093/cid/civ581. PubMed PMID: 26409281; PMCID: 4583568.
26. Nkereuwem E, Togun T, Gomez MP, Székely R, Macé A, Jobe D, Schumacher SG, Kampmann B, Denkinger CM. Comparing accuracy of lipoarabinomannan urine tests for diagnosis of pulmonary tuberculosis in children from four African countries: a cross-sectional study. *Lancet Infect Dis*. 2020. Epub 2020/12/15. doi: 10.1016/s1473-3099(20)30598-3. PubMed PMID: 33316214.
27. Gupta-Wright A, Corbett EL, van Oosterhout JJ, Wilson D, Grint D, Alufandika-Moyo M, Peters JA, Chiume L, Flach C, Lawn SD, Fielding K. Rapid urine-based screening for tuberculosis in HIV-positive patients admitted to hospital in Africa (STAMP): a pragmatic, multicentre, parallel-group, double-blind, randomised controlled trial. *The Lancet*. 2018;392(10144):292-301. doi: [https://doi.org/10.1016/S0140-6736\(18\)31267-4](https://doi.org/10.1016/S0140-6736(18)31267-4).
28. Nicol MP, Zar HJ. New specimens and laboratory diagnostics for childhood pulmonary TB: progress and prospects. *Paediatric respiratory reviews*. 2011;12(1):16-21.
29. Marais BJ. Improved Urine Lipoarabinomannan (LAM) Tests: The Answer for Child Tuberculosis Diagnosis? *Clinical Infectious Diseases*. 2020;72(9):e289-e90. doi: 10.1093/cid/ciaa1058.
30. Irwig L, Bossuyt P, Glasziou P, Gatsonis C, Lijmer J. Designing studies to ensure that estimates of test accuracy are transferable. *Bmj*. 2002;324(7338):669-71. Epub 2002/03/16. doi: 10.1136/bmj.324.7338.669. PubMed PMID: 11895830; PMCID: PMC1122584.
31. Broger T, Muyoyeta M, Kerkhoff AD, Denkinger CM, Moreau E. Tuberculosis test results using fresh versus biobanked urine samples with FujilAM. *The Lancet Infectious Diseases*. 2020;20(1):22-3.



- 401 32. Nicol MP, Allen V, Workman L, Isaacs W, Munro J, Pienaar S, Black F, Adonis L, Zemanay W,  
402 Ghebrekristos Y. Urine lipoarabinomannan testing for diagnosis of pulmonary tuberculosis in children: a  
403 prospective study. *The lancet global health*. 2014;2(5):e278-e84.
- 404 33. Kroidl I, Clowes P, Mwakyelu J, Maboko L, Kiangi A, Rachow A, Reither K, Jung J, Nsojo A,  
405 Saathoff E, Hoelscher M. Reasons for false-positive lipoarabinomannan ELISA results in a Tanzanian  
406 population. *Scand J Infect Dis*. 2013. doi: 10.3109/00365548.2013.853133. PubMed PMID: 24274710.
- 407 34. Kerkhoff AD, Sossen B, Schutz C, Reipold EI, Trollip A, Moreau E, Schumacher SG, Burton R,  
408 Ward A, Nicol MP, Meintjes G, Denkinger CM, Broger T. Diagnostic sensitivity of SILVAMP TB-LAM  
409 (FujiLAM) point-of-care urine assay for extra-pulmonary tuberculosis in people living with HIV. *European  
410 Respiratory Journal*. 2020;55(2):1901259. doi: 10.1183/13993003.01259-2019.
- 411 35. Organization WH. The use of lateral flow urine lipoarabinomannan assay (LF-LAM) for the diagnosis  
412 and screening of active tuberculosis in people living with HIV: policy guidance. World Health Organization,  
413 2015 9241509635.
- 414 36. Peter JG, Zijenah LS, Chanda D, Clowes P, Lesosky M, Gina P, Mehta N, Calligaro G, Lombard CJ,  
415 Kadzirange G, Bandason T, Chansa A, Liusha N, Mangu C, Mtafya B, Msila H, Rachow A, Hoelscher M,  
416 Mwaba P, Theron G, Dheda K. Effect on mortality of point-of-care, urine-based lipoarabinomannan testing  
417 to guide tuberculosis treatment initiation in HIV-positive hospital inpatients: a pragmatic, parallel-group,  
418 multicountry, open-label, randomised controlled trial. *Lancet*. 2016;387(10024):1187-97. doi:  
419 10.1016/S0140-6736(15)01092-2. PubMed PMID: 26970721.
- 420  
21  
22  
23  
24  
25  
26  
27  
28  
29  
30  
31  
32  
33  
34  
35  
36  
37  
38  
39  
40  
41  
42  
43  
44  
45  
46  
47  
48  
49  
50  
51  
52  
53  
54  
55  
56  
57  
58  
59  
60

## TABLE AND FIGURES

Table 1: Cohort characteristics

|                                                               |                                      | Nicol et al                                       | Nkereuwem et al.                                                               | Barrio et al.                                |
|---------------------------------------------------------------|--------------------------------------|---------------------------------------------------|--------------------------------------------------------------------------------|----------------------------------------------|
| <b>Cohort size</b>                                            |                                      | 241                                               | 415                                                                            | 79                                           |
| <b>Study design</b>                                           |                                      | Prospective enrolment<br>Plus enrichment of CLHIV | Prospective enrolment                                                          | Prospective enrolment<br>Plus control cohort |
| <b>Index test</b>                                             | <b>Comparator</b>                    | AlereLAM                                          | AlereLAM                                                                       | none                                         |
|                                                               | <b>Sample storage</b>                | Yes, -80°C                                        | Yes, -80°C                                                                     | Yes, -20°C                                   |
| <b>Country</b>                                                |                                      | South Africa                                      | Gambia, Mali, Nigeria,<br>Tanzania                                             | Haiti                                        |
| <b>Health care level of recruitment of study participants</b> |                                      | Tertiary hospital                                 | Mixed (community,<br>Tertiary hospital, urban<br>comprehensive health<br>care) | Reference hospital                           |
| <b>Age in months (median)<br/>Median (IQR)</b>                |                                      | 45.2<br>(21.2 – 88.8)                             | 67.2<br>(27.6-111.6)                                                           | 76<br>(58–121)                               |
| <b>Age categories</b>                                         | <b>&lt; 5 yrs.</b>                   | 118 (58%)                                         | 194 (47%)                                                                      | 24 (30%)                                     |
|                                                               | <b>≥ 5 yrs.</b>                      | 86 (42%)                                          | 221 (53%)                                                                      | 55 (70%)                                     |
| <b>Male sex</b>                                               |                                      | 111 (54%)                                         | 225 (54%)                                                                      | 51 (65%)                                     |
| <b>TB status</b>                                              | <b>Confirmed TB</b>                  | 84 (41%)                                          | 63 (15%)                                                                       | 5                                            |
|                                                               | <b>Unconfirmed TB</b>                | 81 (40%)                                          | 113 (27%)                                                                      | 50                                           |
|                                                               | <b>Unlikely TB</b>                   | 39 (19%)                                          | 239 (58%)                                                                      | 24                                           |
| <b>HIV status</b>                                             | <b>HIV infected</b>                  | 40 (20%)                                          | 61 (15%)                                                                       | excluded                                     |
|                                                               | <b>CD4 cells/uL<br/>median (IQR)</b> | 552 (206–849)                                     | -                                                                              | -                                            |
| <b>Malnutrition</b>                                           | <b>Stunted</b>                       | 73 (40%)                                          | 134 (32%)                                                                      | 12 (21%)                                     |

**Table 2:** Definitions of reference standards and diagnostic classifications

|                                                         |                                                 | Nicol et al                                                                                                                                                                                                                                                                                      | Nkereuwem et al.                                                                                                                                                                                                                                                                                                                                                                       | Barrio et al.                                                                                                                                                                                                                                                                                                                                                                                                                           |
|---------------------------------------------------------|-------------------------------------------------|--------------------------------------------------------------------------------------------------------------------------------------------------------------------------------------------------------------------------------------------------------------------------------------------------|----------------------------------------------------------------------------------------------------------------------------------------------------------------------------------------------------------------------------------------------------------------------------------------------------------------------------------------------------------------------------------------|-----------------------------------------------------------------------------------------------------------------------------------------------------------------------------------------------------------------------------------------------------------------------------------------------------------------------------------------------------------------------------------------------------------------------------------------|
| <b>Enrolment criteria</b>                               | <b>Inclusion criteria</b>                       | - Symptoms suggestive of TB (pulmonary)                                                                                                                                                                                                                                                          | - Symptoms suggestive of TB (pulmonary)                                                                                                                                                                                                                                                                                                                                                | - Symptoms suggestive of TB (pulmonary and extrapulmonary)<br>- Controls: negative TST and QFT-GIT, and no signs or symptoms of TB                                                                                                                                                                                                                                                                                                      |
|                                                         | <b>Exclusion criteria</b>                       | - More than 72 hours of TB treatment or prophylaxis<br>- Not a resident in Cape Town                                                                                                                                                                                                             | - Not specified<br>- Presence of mediastinal lymphadenopathy alone                                                                                                                                                                                                                                                                                                                     | - Anti-TB treatment for two or more weeks before enrolment<br>- HIV positivity or other known immunodeficiencies or immunosuppressive treatment                                                                                                                                                                                                                                                                                         |
| <b>Symptoms of TB</b>                                   |                                                 | - Cough of any duration and at least one of the following:<br>- Household contact with an infectious tuberculosis source case within the preceding 3 months<br>- Loss of weight or failure to gain weight in the preceding 3 months<br>- Positive tuberculin skin test (TST)<br>- Suggestive CXR | Symptoms suggestive of pulmonary tuberculosis:<br>- Persistent or unremitting cough for more than 2 weeks<br>- and either weight loss, failure to thrive, or persistent unexplained fever                                                                                                                                                                                              | Not specified                                                                                                                                                                                                                                                                                                                                                                                                                           |
| <b>TB sampling &amp; microbiological investigations</b> |                                                 | At least one induced sputum Xpert MTB/RIF or Xpert MTB/RIF Ultra® & MGIT                                                                                                                                                                                                                         | At least one induced sputum Xpert MTB/Rif Ultra® (all sites) & MGIT/LJ (not Nigerian site)                                                                                                                                                                                                                                                                                             | Three consecutive respiratory samples (induced or nasopharyngeal/nasogastric aspiration)<br>Smear microscopy, Xpert MTB/RIF if positive smear microscopy OR abnormal Xray                                                                                                                                                                                                                                                               |
| <b>TB case classification</b>                           | <b>Confirmed TB</b>                             | Any induced sputum culture or Xpert MTB/RIF positive for M. tuberculosis                                                                                                                                                                                                                         | Bacteriological confirmation of Mycobacterium tuberculosis (culture, Xpert MTB/RIF assay, or both) from at least one respiratory specimen                                                                                                                                                                                                                                              | Any sputum Xpert MTB/RIF positive for M. tuberculosis                                                                                                                                                                                                                                                                                                                                                                                   |
|                                                         | <b>Unconfirmed TB</b>                           | All children not defined as confirmed or unlikely TB                                                                                                                                                                                                                                             | Bacteriological confirmation not obtained, and at least one (if TST/QFT-GIT pos) OR two (if TST/QFT-GIT neg) of the following:<br>- Symptoms or signs suggestive of tuberculosis<br>- Chest radiograph consistent with tuberculosis<br>- Close tuberculosis exposure<br>- Positive response to tuberculosis treatment (requires documented positive clinical response to tuberculosis) | Bacteriological confirmation not obtained<br>And positive TST/QFT-GIT and at least one of the following<br>- X-rays consistent with TB<br>- signs and symptoms of TB<br>- close TB exposure, or<br>- positive response to TB treatment<br>OR if TST/QFT-GIT negative at least<br>- two clinical criteria<br>- X-rays consistent with TB<br>- signs and symptoms of TB<br>- close TB exposure, or<br>- positive response to TB treatment |
|                                                         | <b>Unlikely TB</b>                              | All of the following:<br>- TB culture negative<br>- No tuberculosis treatment given<br>- Documented improvement of symptoms and signs at follow up visit                                                                                                                                         | Bacteriological confirmation not obtained and criteria for unconfirmed tuberculosis not met                                                                                                                                                                                                                                                                                            | Only evidence of M. tuberculosis infection<br>OR presented only one clinical criterion compatible with TB<br>Controls: negative TST and QFT-GIT, and no signs or symptoms of TB                                                                                                                                                                                                                                                         |
| <b>Definition of reference standards</b>                | <b>Microbiological reference standard (MRS)</b> | Positive = confirmed TB<br>Negative = unconfirmed & unlikely TB                                                                                                                                                                                                                                  | Positive = confirmed TB<br>Negative = unconfirmed & unlikely TB                                                                                                                                                                                                                                                                                                                        | Positive = confirmed TB<br>Negative = unconfirmed & unlikely TB + controls                                                                                                                                                                                                                                                                                                                                                              |
|                                                         | <b>Composite reference standard (CRS)</b>       | Positive = confirmed & unconfirmed TB<br>Negative = unlikely TB                                                                                                                                                                                                                                  | Positive = confirmed & unconfirmed TB<br>Negative = unlikely TB                                                                                                                                                                                                                                                                                                                        | Positive = confirmed & unconfirmed TB<br>Negative = unlikely TB + controls                                                                                                                                                                                                                                                                                                                                                              |

**Table 3:** Diagnostic accuracy estimates as reported by the original publications, with 95% confidence intervals (CI)

|                     | Barrio et al. |        |        |        |        |        |       |        |        | Nicol et al |        |        |        |        |                 |       |        |        | Nkereuwem et al. |        |        |        |        |                 |           |        |       |
|---------------------|---------------|--------|--------|--------|--------|--------|-------|--------|--------|-------------|--------|--------|--------|--------|-----------------|-------|--------|--------|------------------|--------|--------|--------|--------|-----------------|-----------|--------|-------|
|                     | Total (n)     | TP (n) | FP (n) | FN (n) | TN (n) | Sens % | 95%CI | Spec % | 95%CI  | Total (n)   | TP (n) | FP (n) | FN (n) | TN (n) | Sens %          | 95%CI | Spec % | 95%CI  | Total (n)        | TP (n) | FP (n) | FN (n) | TN (n) | Sens %          | 95%CI     | Spec % | 95%CI |
| <b>Overall</b>      |               |        |        |        |        |        |       |        |        |             |        |        |        |        |                 |       |        |        |                  |        |        |        |        |                 |           |        |       |
| MRS                 | 79            | 3      | 5      | 2      | 69     | 60     | 17-93 | 95     | 73-100 | 204         | 35     | 10     | 49     | 110    | 41              | 32-52 | 92     | 85-95  | 415              | 40     | 55     | 23     | 297    | 65              | 44-85     | 84     | 77-89 |
| CRS                 | 73            | 6      | 2      | 49     | 22     | 11     | 5-23  | 92     | 72-99  | 204         | 44     | 1      | 121    | 38     | 26              | 21-34 | 97     | 87-100 | 415              | 58     | 37     | 118    | 202    | 33              | 25-42     | 83     | 72-92 |
| <b>HIV positive</b> |               |        |        |        |        |        |       |        |        |             |        |        |        |        |                 |       |        |        |                  |        |        |        |        |                 |           |        |       |
| MRS                 | -             | -      | -      | -      | -      | -      | -     | -      | -      | 40          | 15     | 1      | 10     | 14     | 60              | 41-77 | 93     | 70-99  | 61               | 8      | 11     | 7      | 35     | 55              | 29-82     | 76     | 62-87 |
| CRS                 | -             | -      | -      | -      | -      | -      | -     | -      | -      | -           | -      | -      | -      | -      | -               | -     | -      | -      | 61               | 14     | 5      | 30     | 12     | 32              | 18.9-47.0 | 71     | 47-92 |
| <b>HIV negative</b> |               |        |        |        |        |        |       |        |        |             |        |        |        |        |                 |       |        |        |                  |        |        |        |        |                 |           |        |       |
| MRS                 | -             | -      | -      | -      | -      | -      | -     | -      | -      | 164         | 20     | 9      | 39     | 96     | 34              | 23-47 | 91     | 85-95  | 344              | 31     | 40     | 15     | 258    | 68              | 42-88     | 86     | 79-91 |
| CRS                 | -             | -      | -      | -      | -      | -      | -     | -      | -      | -           | -      | -      | -      | -      | -               | -     | -      | -      | 344              | 43     | 28     | 86     | 187    | 33              | 24-44     | 86     | 76-92 |
| <b>Age</b>          |               |        |        |        |        |        |       |        |        |             |        |        |        |        |                 |       |        |        |                  |        |        |        |        |                 |           |        |       |
|                     |               |        |        |        |        |        |       |        |        |             |        |        |        |        | <b>&lt;2yrs</b> |       |        |        |                  |        |        |        |        | <b>&lt;5yrs</b> |           |        |       |
| MRS                 | -             | -      | -      | -      | -      | -      | -     | -      | -      | 59          | 9      | 7      | 13     | 30     | 41              | 23-61 | 81     | 66-91  | 194              | 16     | 35     | 10     | 133    | 62              | 37-86     | 79     | 69-86 |
| CRS                 | -             | -      | -      | -      | -      | -      | -     | -      | -      | -           | -      | -      | -      | -      | -               | -     | -      | -      | 194              | 28     | 23     | 55     | 88     | 33              | 20-48     | 78     | 67-87 |
| <b>Age</b>          |               |        |        |        |        |        |       |        |        |             |        |        |        |        | <b>&gt;2yrs</b> |       |        |        |                  |        |        |        |        | <b>&lt;5yrs</b> |           |        |       |
| MRS                 | -             | -      | -      | -      | -      | -      | -     | -      | -      | 145         | 26     | 3      | 36     | 80     | 42              | 30-54 | 96     | 90-99  | 221              | 24     | 20     | 13     | 164    | 67              | 40-90     | 89     | 82-94 |
| CRS                 | -             | -      | -      | -      | -      | -      | -     | -      | -      | -           | -      | -      | -      | -      | -               | -     | -      | -      | 221              | 30     | 14     | 63     | 114    | 33              | 22-44     | 88     | 76-96 |

**Table 4:** Diagnostic test performance stratified by clinical case definition

| FujiLAM result | All | Confirmed TB n/N (%) |     |       |     | Unconfirmed TB |     |        |     | Unlikely TB |     |         |     | Controls |    |       |     |
|----------------|-----|----------------------|-----|-------|-----|----------------|-----|--------|-----|-------------|-----|---------|-----|----------|----|-------|-----|
|                |     | pos                  | neg | pos   | neg | pos            | neg | pos    | neg | pos         | neg | pos     | neg |          |    |       |     |
| Barrio         | 79  | 3/5                  | 60% | 2/5   | 40% | 3/50           | 6%  | 47/50  | 94% | 1/4         | 25% | 3/4     | 75% | 1/20     | 5% | 19/20 | 95% |
| Nicol          | 204 | 35/84                | 42% | 49/84 | 58% | 9/81           | 11% | 72/81  | 89% | 1/39        | 3%  | 38/39   | 97% | -        | -  | -     | -   |
| Nkereuwem      | 415 | 40/63                | 63% | 23/63 | 37% | 18/113         | 16% | 95/113 | 84% | 37/239      | 15% | 202/239 | 85% | -        | -  | -     | -   |



433 **Figure 1:** Assessment of study quality of FujiLAM paediatric studies using the QUADAS-2  
1  
2  
34 framework. Risk of bias and applicability concerns graph (A) and summary (B): review authors'  
4  
435 judgements about each domain presented as percentages across included studies  
6  
436  
8

9  
10 **Figure 2:** Forest Plots of performance of lateral flow LAM assays against MRS and CRS.  
11  
12 Performance estimates were calculated using the raw numbers provided in the studies and  
13  
14 visualised using RevMan (20).  
15  
16  
17  
18  
19  
20  
21  
22  
23  
24  
25  
26  
27  
28  
29  
30  
31  
32  
33  
34

#### 438 **Author's contribution:**

35  
36  
37 LO and NK conducted the literature search, screening of abstracts, data extraction, and analyses,  
38  
39 supported by EMB and RS. The manuscript was written mainly by LO and NK, and reviewed and  
40  
41 edited by EMB, MR, NH, and RS.  
42  
43  
44  
45  
46  
47  
48  
49  
50  
51  
52  
53  
54  
55  
56  
57  
58  
59  
60

1  
2  
3  
4  
5  
6  
7  
8  
9  
10  
11  
12  
13  
14  
15  
16  
17  
18  
19  
20  
21  
22  
23  
24  
25  
26  
27  
28  
29  
30  
31  
32  
33  
34  
35  
36  
37  
38  
39  
40  
41  
42  
43  
44  
45  
46  
47  
48  
49  
50  
51  
52  
53  
54  
55  
56  
57  
58  
59  
60

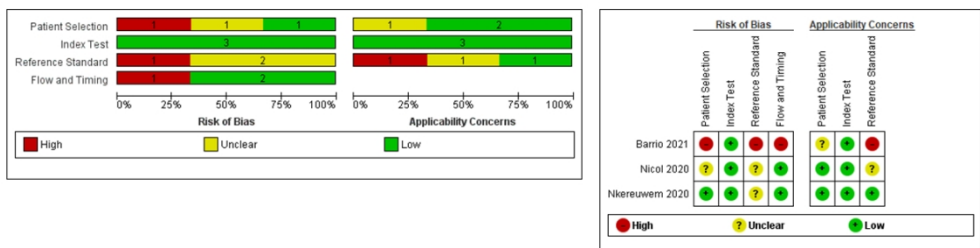

855x481mm (38 x 38 DPI)

**FujiLAM vs MRS**

| Study          | TP | FP | FN | TN  | Sensitivity (95% CI) | Specificity (95% CI) | Sensitivity (95% CI) | Specificity (95% CI) |
|----------------|----|----|----|-----|----------------------|----------------------|----------------------|----------------------|
| Barrio 2021    | 3  | 5  | 2  | 69  | 0.60 [0.15, 0.95]    | 0.93 [0.85, 0.98]    |                      |                      |
| Nicol 2020     | 35 | 10 | 49 | 110 | 0.42 [0.31, 0.53]    | 0.92 [0.85, 0.96]    |                      |                      |
| Nkereuwem 2020 | 40 | 55 | 23 | 297 | 0.63 [0.50, 0.75]    | 0.84 [0.80, 0.88]    |                      |                      |

**FujiLAM vs CRS**

| Study          | TP | FP | FN  | TN  | Sensitivity (95% CI) | Specificity (95% CI) | Sensitivity (95% CI) | Specificity (95% CI) |
|----------------|----|----|-----|-----|----------------------|----------------------|----------------------|----------------------|
| Barrio 2021    | 6  | 2  | 49  | 22  | 0.11 [0.04, 0.22]    | 0.92 [0.73, 0.99]    |                      |                      |
| Nicol 2020     | 44 | 1  | 121 | 38  | 0.27 [0.20, 0.34]    | 0.97 [0.87, 1.00]    |                      |                      |
| Nkereuwem 2020 | 58 | 37 | 118 | 202 | 0.33 [0.26, 0.40]    | 0.85 [0.79, 0.89]    |                      |                      |

**FujiLAM vs MRS in HIV +**

| Study          | TP | FP | FN | TN | Sensitivity (95% CI) | Specificity (95% CI) | Sensitivity (95% CI) | Specificity (95% CI) |
|----------------|----|----|----|----|----------------------|----------------------|----------------------|----------------------|
| Barrio 2021    | 0  | 0  | 0  | 0  | Not estimable        | Not estimable        |                      |                      |
| Nicol 2020     | 15 | 1  | 10 | 14 | 0.60 [0.39, 0.79]    | 0.93 [0.68, 1.00]    |                      |                      |
| Nkereuwem 2020 | 8  | 11 | 7  | 35 | 0.53 [0.27, 0.79]    | 0.76 [0.61, 0.87]    |                      |                      |

**FujiLAM vs MRS in HIV-**

| Study          | TP | FP | FN | TN  | Sensitivity (95% CI) | Specificity (95% CI) | Sensitivity (95% CI) | Specificity (95% CI) |
|----------------|----|----|----|-----|----------------------|----------------------|----------------------|----------------------|
| Barrio 2021    | 3  | 5  | 2  | 69  | 0.60 [0.15, 0.95]    | 0.93 [0.85, 0.98]    |                      |                      |
| Nicol 2020     | 20 | 9  | 39 | 96  | 0.34 [0.22, 0.47]    | 0.91 [0.84, 0.96]    |                      |                      |
| Nkereuwem 2020 | 31 | 40 | 15 | 258 | 0.67 [0.52, 0.80]    | 0.87 [0.82, 0.90]    |                      |                      |

258x176mm (72 x 72 DPI)

### Search strategy for supplementary materials

#### PubMed

((("child\*" [Title/Abstract] OR "infant\*" [Title/Abstract] OR "adolescent\*" [Title/Abstract] OR "paediatric\*" [Title/Abstract] OR "pediatric\*" [Title/Abstract]) AND ("LAM" [Title/Abstract] OR "lipoarabinomannan" [Title/Abstract])) AND (("tuberculos\*" [Title/Abstract] OR "TB" [Title/Abstract] OR MTB [Title/Abstract] OR PTB [Title/Abstract] OR mycobacterium tuberculosis [MeSH Terms] OR tuberculosis [MeSH Terms]))

#### EMBASE

1. mycobacterium tuberculosis/
2. tuberculosis/ or lung tuberculosis/
3. (tuberculos\*).mp.
4. MTB.mp.
5. Tb.mp.
6. (child\*).mp.
7. (infant\*).mp.
8. (adolescent\*).mp.
9. (paediatric\*).mp.
10. (pediatric\*).mp.
11. Lipoarabinomannan/
12. LAM.mp.
13. Lipoarabinomannan.mp.
14. 1 or 2 or 3 or 4 or 5
15. 6 or 7 or 8 or 9 or 10
16. 11 or 12 or 13
17. 14 and 15 and 16
18. (exp animals/ or nonhuman/) not human/
19. 17 not 18
20. conference\*.pt
21. 19 not 20
