# Supplementary material for: FujiLAM for the diagnosis of childhood tuberculosis: a systematic review
Source: PubMed Central journal article supplement — BMJ Paediatr Open. 2022 Jul 13;6(1):e001447. doi: 10.1136/bmjpo-2022-001447 (PMC9280905; doi:10.1136/bmjpo-2022-001447), 2022-07-13
Supplement: bmjpo-2022-001447supp001.pdf [file bmjpo-2022-001447supp001.pdf]

**Search strategy for supplementary materials**

## PubMed

("child\*[Title/Abstract] OR "infant\*[Title/Abstract] OR "adolescent\*[Title/Abstract] OR "paediatric\*[Title/Abstract] OR "pediatric\*[Title/Abstract]) AND ("LAM"[Title/Abstract] OR "lipoarabinomannan"[Title/Abstract])) AND (("tuberculos\*[Title/Abstract] OR "TB"[Title/Abstract] OR MTB[Title/Abstract] OR PTB[Title/Abstract] OR mycobacterium tuberculosis[MeSH Terms] OR tuberculosis[MeSH Terms]))

## EMBASE

1. mycobacterium tuberculosis/
2. tuberculosis/ or lung tuberculosis/
3. (tuberculos\*).mp.
4. MTB.mp.
5. Tb.mp.
6. (child\*).mp.
7. (infant\*).mp.
8. (adolescent\*).mp.
9. (paediatric\*).mp.
10. (pediatric\*).mp.
11. Lipoarabinomannan/
12. LAM.mp.
13. Lipoarabinomannan.mp.
14. 1 or 2 or 3 or 4 or 5
15. 6 or 7 or 8 or 9 or 10
16. 11 or 12 or 13
17. 14 and 15 and 16
18. (exp animals/ or nonhuman/) not human/
19. 17 not 18
20. conference\*.pt
21. 19 not 20
