# Supplementary material for: FujiLAM for the diagnosis of childhood tuberculosis: a systematic review
Source: PubMed Central journal article supplement — BMJ Paediatr Open. 2022 Jul 13;6(1):e001447. doi: 10.1136/bmjpo-2022-001447 (PMC9280905; doi:10.1136/bmjpo-2022-001447), 2022-07-13
Supplement: bmjpo-2022-001447supp003.pdf [file bmjpo-2022-001447supp003.pdf]

**Supplemental Table 1: Diagnostic accuracy estimates as reported by authors**

|                    | Nicol et al.    |           |           |           |           |           |           |           |           | Nkereuwem et al. |           |           |           |           |           |           |           |           | Barrio et al. |           |           |           |           |           |       |           |        |
|--------------------|-----------------|-----------|-----------|-----------|-----------|-----------|-----------|-----------|-----------|------------------|-----------|-----------|-----------|-----------|-----------|-----------|-----------|-----------|---------------|-----------|-----------|-----------|-----------|-----------|-------|-----------|--------|
|                    | Total<br>(n)    | TP<br>(n) | FP<br>(n) | FN<br>(n) | TN<br>(n) | Sens<br>% | 95%CI     | Spec<br>% | 95%CI     | Total<br>(n)     | TP<br>(n) | FP<br>(n) | FN<br>(n) | TN<br>(n) | Sens<br>% | 95%CI     | Spec<br>% | 95%CI     | Total<br>(n)  | TP<br>(n) | FP<br>(n) | FN<br>(n) | TN<br>(n) | Sens<br>% | 95%CI | Spec<br>% | 95%CI  |
| <b>Overall</b>     |                 |           |           |           |           |           |           |           |           |                  |           |           |           |           |           |           |           |           |               |           |           |           |           |           |       |           |        |
| <b>MRS</b>         |                 |           |           |           |           |           |           |           |           |                  |           |           |           |           |           |           |           |           |               |           |           |           |           |           |       |           |        |
| FujiLAM            | 204             | 35        | 10        | 49        | 110       | 41.7      | 31.7–52.3 | 91.7      | 85.3–95.4 | 415              | 40        | 55        | 23        | 297       | 64.9      | 43.7–85.2 | 83.8      | 76.5–89.4 | 79            | 3         | 5         | 2         | 69        | 60        | 17–93 | 95        | 73–100 |
| AlereLAM           | 204             | 42        | 41        | 42        | 79        | 50.0      | 39.5–60.5 | 65.8      | 57.0–73.7 | 415              | 19        | 40        | 44        | 312       | 30.7      | 8.6–61.6  | 87.8      | 79.0–93.7 | -             | -         | -         | -         | -         | -         | -     | -         | -      |
| <b>CRS</b>         |                 |           |           |           |           |           |           |           |           |                  |           |           |           |           |           |           |           |           |               |           |           |           |           |           |       |           |        |
| FujiLAM            | 204             | 44        | 1         | 121       | 38        | 26.7      | 20.5–33.9 | 97.4      | 86.8–99.5 | 415              | 58        | 37        | 118       | 202       | 32.9      | 24.6–41.9 | 83.3      | 71.8–91.7 | 73            | 6         | 2         | 49        | 22        | 11        | 523   | 92        | 72–99  |
| AlereLAM           | 204             | 73        | 10        | 92        | 29        | 44.2      | 36.9–51.9 | 74.4      | 58.9–85.4 | 415              | 36        | 23        | 140       | 216       | 20.2      | 12.3–29.4 | 90.0      | 81.6–95.6 | -             | -         | -         | -         | -         | -         | -     | -         | -      |
| <b>HIVpositive</b> |                 |           |           |           |           |           |           |           |           |                  |           |           |           |           |           |           |           |           |               |           |           |           |           |           |       |           |        |
| <b>MRS</b>         |                 |           |           |           |           |           |           |           |           |                  |           |           |           |           |           |           |           |           |               |           |           |           |           |           |       |           |        |
| FujiLAM            | 40              | 15        | 1         | 10        | 14        | 60.0      | 40.7–76.6 | 93.3      | 70.2–98.8 | 61               | 8         | 11        | 7         | 35        | 54.8      | 28.7–81.5 | 75.9      | 61.8–86.9 | -             | -         | -         | -         | -         | -         | -     | -         | -      |
| AlereLAM           | 40              | 9         | 8         | 16        | 7         | 36.0      | 20.2–55.5 | 46.7      | 24.8–69.9 | 61               | 5         | 9         | 10        | 37        | 36.6      | 13.8–70.4 | 80.4      | 66.3–91.0 | -             | -         | -         | -         | -         | -         | -     | -         | -      |
| <b>CRS</b>         |                 |           |           |           |           |           |           |           |           |                  |           |           |           |           |           |           |           |           |               |           |           |           |           |           |       |           |        |
| FujiLAM            | -               | -         | -         | -         | -         | -         | -         | -         | -         | 61               | 14        | 5         | 30        | 12        | 31.9      | 18.9–47.0 | 71.4      | 46.8–91.5 | -             | -         | -         | -         | -         | -         | -     | -         | -      |
| AlereLAM           | -               | -         | -         | -         | -         | -         | -         | -         | -         | 61               | 13        | 1         | 31        | 16        | 29.3      | 16.3–44.6 | 92.8      | 72.6–99.8 | -             | -         | -         | -         | -         | -         | -     | -         | -      |
| <b>HIVnegative</b> |                 |           |           |           |           |           |           |           |           |                  |           |           |           |           |           |           |           |           |               |           |           |           |           |           |       |           |        |
| <b>MRS</b>         |                 |           |           |           |           |           |           |           |           |                  |           |           |           |           |           |           |           |           |               |           |           |           |           |           |       |           |        |
| FujiLAM            | 164             | 20        | 9         | 39        | 96        | 33.9      | 23.1–46.6 | 91.4      | 84.5–95.4 | 344              | 31        | 40        | 15        | 258       | 67.5      | 41.8–88.0 | 85.9      | 79.2–91.0 | -             | -         | -         | -         | -         | -         | -     | -         | -      |
| AlereLAM           | 164             | 33        | 33        | 26        | 72        | 55.9      | 43.3–67.8 | 68.6      | 59.2–76.7 | 344              | 14        | 30        | 32        | 268       | 26.6      | 1.2–66.4  | 89.1      | 80.7–94.7 | -             | -         | -         | -         | -         | -         | -     | -         | -      |
| <b>CRS</b>         |                 |           |           |           |           |           |           |           |           |                  |           |           |           |           |           |           |           |           |               |           |           |           |           |           |       |           |        |
| FujiLAM            | -               | -         | -         | -         | -         | -         | -         | -         | -         | 344              | 43        | 28        | 86        | 187       | 33.2      | 23.7–43.5 | 85.7      | 76.2–92.2 | -             | -         | -         | -         | -         | -         | -     | -         | -      |
| AlereLAM           | -               | -         | -         | -         | -         | -         | -         | -         | -         | 344              | 23        | 21        | 106       | 194       | 15.3      | 1.7–37.5  | 89.3      | 81.0–94.7 | -             | -         | -         | -         | -         | -         | -     | -         | -      |
| <b>Age</b>         | <b>&lt;2yrs</b> |           |           |           |           |           |           |           |           | <b>&lt;5yrs</b>  |           |           |           |           |           |           |           |           |               |           |           |           |           |           |       |           |        |
| <b>MRS</b>         |                 |           |           |           |           |           |           |           |           |                  |           |           |           |           |           |           |           |           |               |           |           |           |           |           |       |           |        |
| FujiLAM            | 59              | 9         | 7         | 13        | 30        | 40.9      | 23.3–61.3 | 81.1      | 65.8–90.5 | 194              | 16        | 35        | 10        | 133       | 61.8      | 36.6–85.5 | 78.5      | 69.1–86.0 | -             | -         | -         | -         | -         | -         | -     | -         | -      |
| AlereLAM           | 59              | 16        | 18        | 6         | 19        | 72.7      | 51.8–86.8 | 51.4      | 35.9–66.6 | 194              | 9         | 32        | 17        | 136       | 38.8      | 0.4–98.9  | 80.5      | 68.3–89.4 | -             | -         | -         | -         | -         | -         | -     | -         | -      |
| <b>CRS</b>         |                 |           |           |           |           |           |           |           |           |                  |           |           |           |           |           |           |           |           |               |           |           |           |           |           |       |           |        |
| FujiLAM            | -               | -         | -         | -         | -         | -         | -         | -         | -         | 194              | 28        | 23        | 55        | 88        | 33.3      | 19.8–48.3 | 78.4      | 66.5–87.2 | -             | -         | -         | -         | -         | -         | -     | -         | -      |
| AlereLAM           | -               | -         | -         | -         | -         | -         | -         | -         | -         | 194              | 20        | 21        | 63        | 90        | 23.3      | 10.0–39.9 | 81.4      | 70.4–90.4 | -             | -         | -         | -         | -         | -         | -     | -         | -      |
| <b>Age</b>         | <b>&gt;2yrs</b> |           |           |           |           |           |           |           |           | <b>&lt;5yrs</b>  |           |           |           |           |           |           |           |           |               |           |           |           |           |           |       |           |        |
| <b>MRS</b>         |                 |           |           |           |           |           |           |           |           |                  |           |           |           |           |           |           |           |           |               |           |           |           |           |           |       |           |        |
| FujiLAM            | 145             | 26        | 3         | 36        | 80        | 41.9      | 30.5–54.3 | 96.4      | 90.0–98.8 | 221              | 24        | 20        | 13        | 164       | 67.1      | 40.1–90.2 | 88.8      | 82.1–93.6 | -             | -         | -         | -         | -         | -         | -     | -         | -      |
| AlereLAM           | 145             | 26        | 23        | 36        | 60        | 41.9      | 30.5–54.3 | 72.3      | 61.8–80.8 | 221              | 10        | 8         | 27        | 176       | 26.9      | 7.2–54.8  | 95.2      | 89.7–98.3 | -             | -         | -         | -         | -         | -         | -     | -         | -      |
| <b>CRS</b>         |                 |           |           |           |           |           |           |           |           |                  |           |           |           |           |           |           |           |           |               |           |           |           |           |           |       |           |        |
| FujiLAM            | -               | -         | -         | -         | -         | -         | -         | -         | -         | 221              | 30        | 14        | 63        | 114       | 32.7      | 22.4–44.4 | 88.2      | 76.0–96.4 | -             | -         | -         | -         | -         | -         | -     | -         | -      |
| AlereLAM           | -               | -         | -         | -         | -         | -         | -         | -         | -         | 221              | 16        | 2         | 77        | 126       | 17.3      | 9.6–27.4  | 98.1      | 93.7–99.9 | -             | -         | -         | -         | -         | -         | -     | -         | -      |
