# Supplementary figures and images for: FujiLAM for the diagnosis of childhood tuberculosis: a systematic review
Source: PubMed Central journal article supplement — BMJ Paediatr Open. 2022 Jul 13;6(1):e001447. doi: 10.1136/bmjpo-2022-001447 (PMC9280905; doi:10.1136/bmjpo-2022-001447), 2022-07-13

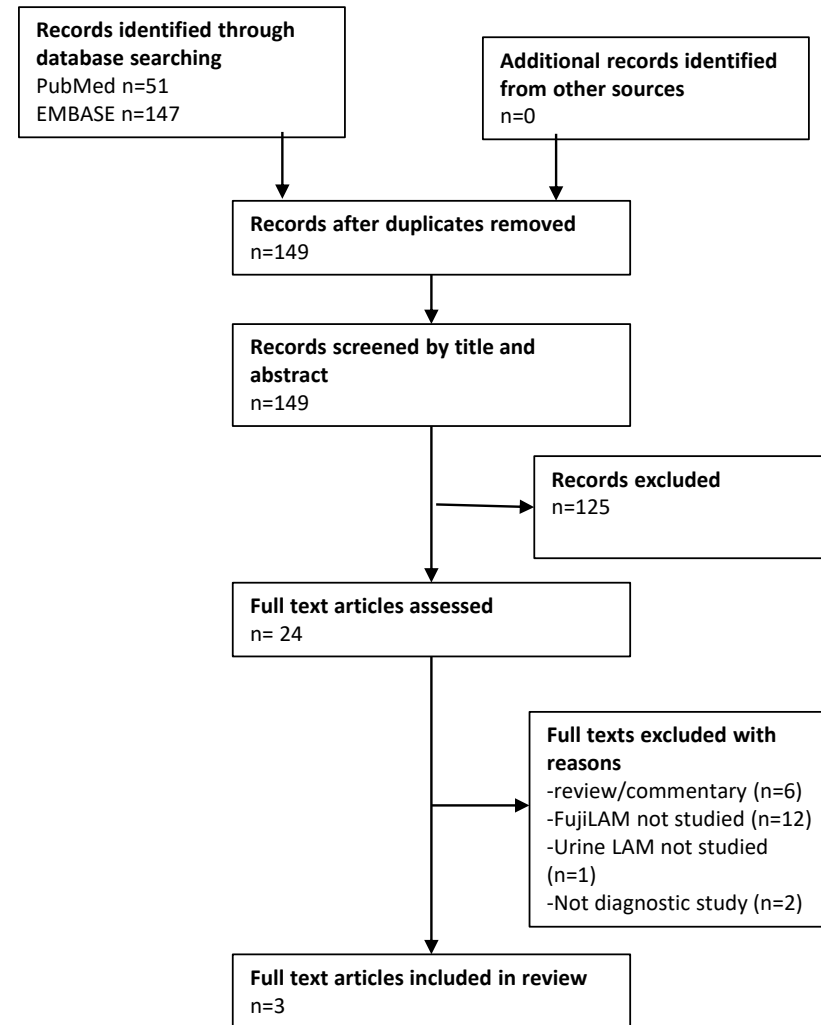

Supplement: bmjpo-2022-001447supp002.pdf [file bmjpo-2022-001447supp002.pdf]
